## RESEARCH ARTICLE

# The five homologous CiaR-controlled Ccn sRNAs of *Streptococcus pneumoniae* modulate Zn-resistance

Nicholas R. De Lay<sup>1,2\*</sup>, Nidhi Verma<sup>1</sup>, Dhriti Sinha<sup>1</sup>, Abigail Garrett<sup>3</sup>, Maximilian K. Osterberg<sup>4</sup>, Daisy Porter<sup>1</sup>, Spencer Reiling<sup>1</sup>, David P. Giedroc<sup>4</sup>, Malcolm E. Winkler<sup>3</sup>

**1** Department of Microbiology and Molecular Genetics, McGovern Medical School, University of Texas Health Science Center, Houston, Texas, United States of America, **2** MD Anderson Cancer Center UTHealth Graduate School of Biomedical Sciences, University of Texas Health Science Center, Houston, Texas, United States of America, **3** Department of Biology, Indiana University Bloomington, Bloomington, Indiana, United States of America, **4** Department of Chemistry, Indiana University, Bloomington, Bloomington, Indiana, United States of America

\* [nicholas.r.delay@uth.tmc.edu](mailto:nicholas.r.delay@uth.tmc.edu)

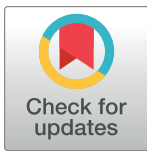

## OPEN ACCESS

**Citation:** De Lay NR, Verma N, Sinha D, Garrett A, Osterberg MK, Porter D, et al. (2024) The five homologous CiaR-controlled Ccn sRNAs of *Streptococcus pneumoniae* modulate Zn-resistance. PLoS Pathog 20(10): e1012165. <https://doi.org/10.1371/journal.ppat.1012165>

**Editor:** Rachel M. McLoughlin, Trinity College Dublin, IRELAND

**Received:** April 2, 2024

**Accepted:** September 22, 2024

**Published:** October 3, 2024

**Peer Review History:** PLOS recognizes the benefits of transparency in the peer review process; therefore, we enable the publication of all of the content of peer review and author responses alongside final, published articles. The editorial history of this article is available here: <https://doi.org/10.1371/journal.ppat.1012165>

**Copyright:** © 2024 De Lay et al. This is an open access article distributed under the terms of the [Creative Commons Attribution License](https://creativecommons.org/licenses/by/4.0/), which permits unrestricted use, distribution, and reproduction in any medium, provided the original author and source are credited.

**Data Availability Statement:** Primary data from the mRNA-seq analyses were submitted to the NCBI Gene Expression Omnibus (GEO) and have the accession number GSE246655.

## Abstract

Zinc is a vital transition metal for all bacteria; however, elevated intracellular free Zn levels can result in mis-metalation of Mn-dependent enzymes. For Mn-centric bacteria such as *Streptococcus pneumoniae* that primarily use Mn instead of Fe as an enzyme cofactor, Zn is particularly toxic at high concentrations. Here, we report our identification and characterization of the function of the five homologous, CiaRH-regulated Ccn sRNAs in controlling *S. pneumoniae* virulence and metal homeostasis. We show that deletion of all five *ccn* genes (*ccnA*, *ccnB*, *ccnC*, *ccnD*, and *ccnE*) from *S. pneumoniae* strains D39 (serotype 2) and TIGR4 (serotype 4) causes Zn hypersensitivity and an attenuation of virulence in a murine invasive pneumonia model. We provide evidence that bioavailable Zn disproportionately increases in *S. pneumoniae* strains lacking the five *ccn* genes. Consistent with a response to Zn intoxication or relatively high intracellular free Zn levels, expression of genes encoding the CzcD Zn exporter and the Mn-independent ribonucleotide reductase, NrdD-NrdG, were increased in the  $\Delta ccnABCDE$  mutant relative to its isogenic *ccn*<sup>+</sup> parent strain. The growth inhibition by Zn that occurs as the result of loss of the *ccn* genes is rescued by supplementation with Mn or Oxyrase, a reagent that removes dissolved oxygen. Lastly, we found that the Zn-dependent growth inhibition of the  $\Delta ccnABCDE$  strain was not altered by deletion of *sodA*, whereas the *ccn*<sup>+</sup>  $\Delta sodA$  strain phenocopied the  $\Delta ccnABCDE$  strain. Overall, our results indicate that the Ccn sRNAs have a crucial role in preventing Zn intoxication in *S. pneumoniae*.

## Author summary

Zn and Mn are essential micronutrients for many bacteria, including *Streptococcus pneumoniae*. While Zn performs vital structural or catalytic roles in certain proteins, in excess, Zn can inhibit Mn uptake by *S. pneumoniae* and displace, but not functionally replace Mn

**Funding:** This work was supported by NIGMS grant T32GM131994 (to M.K.O.), NIGMS grant R35GM118157 (to D.P.G.), NIGMS grant R35GM131767 (to M.E.W.), McGovern Medical Startup funds, and NIAID grant R21AI171771 (to N.R.D.L.). The funders had no role in study design, data collection and analysis, decision to publish, or preparation of the manuscript.

**Competing interests:** The authors have declared that no competing interests exist.

from key enzymes including superoxide dismutase A (SodA). Here, we show that the Ccn small regulatory RNAs promote *S. pneumoniae* resistance to Zn intoxication. Furthermore, we demonstrate that these small regulatory RNAs modulate the ability of *S. pneumoniae* to cause invasive pneumonia. Altogether, these findings reveal a new layer of regulation of *S. pneumoniae* Zn homeostasis and suggest that there are factors in addition to known transporters that modulate intracellular, bioavailable Zn levels.

## Introduction

Small regulatory RNAs have been established as fundamental regulators of gene expression in bacteria and are involved in controlling nearly every aspect of bacterial physiology, metabolism, and behavior [1–3]. Two basic classes of small regulatory RNAs have been identified and characterized, those that control gene expression by directly interacting with transcripts via hydrogen bonding between complementary or wobble base-pairs and others that indirectly affect transcript abundance by titrating an RNA or DNA-binding protein [4,5]. Interactions between the former class of riboregulators, henceforth referred to as sRNAs, and their cognate target transcripts can result in changes in mRNA transcription, translation, and/or stability depending on many factors including the sequence, accessibility, structure, and location of the sRNA binding site. One of the most facile yet prevalent modes of regulation involves the sRNA binding within or adjacent to the translation initiation region blocking the 16S rRNA within the 30S ribosomal subunit from base-pairing with the complementary Shine-Delgarno sequence, or ribosome binding site, within the mRNA. Many other elegant mechanisms of sRNA-based gene regulation have been uncovered [6–8]. While a large amount of progress has been made towards understanding the contribution of sRNAs to the response of Gram-negative bacteria such as *Escherichia coli* to internally and externally derived stresses, environmental cues, and host interactions, much less headway has been achieved in understanding the functions of sRNAs in Gram-positive bacteria, particularly, *Streptococcus pneumoniae* (pneumococcus).

The Gram-positive, ovoid diplococcus *S. pneumoniae* is a leading cause of lower respiratory infection morbidity and mortality worldwide resulting in nearly 2 million deaths per year [9]. We and others have discovered 100s of putative sRNAs in *S. pneumoniae* [10–15], but the functions of almost all of them remains a mystery. Among the first sRNAs identified in *S. pneumoniae* were the five homologous Ccn sRNAs (CcnA, CcnB, CcnC, CcnD, and CcnE) [15,16], which are highly similar in sequence and predicted structure; however, CcnE contains a small insertion in its 5' end. Each Ccn sRNA is primarily transcribed from its own promoter, which is activated by the CiaRH two-component system; expression of the CiaRH two-component systems is induced by penicillin and sialic acid [17,18]. Regardless, considerable variation exists in the level of transcription of each Ccn sRNA, with CcnC being transcribed at approximate 3- to 5-times higher levels than other Ccn sRNAs under some conditions [16]. Shortly after the discovery of the five Ccn sRNAs, Tsui, Mukerjee (Sinha), et al demonstrated that CcnA negatively regulates competence and the *comCDE* mRNA encoding the precursor of the competence stimulating peptide and the two-component system that responds to this signal and activates competence [15]. Schnorpfel et al formally demonstrated that the five Ccn sRNAs negatively regulate competence by base-pairing with the *comCDE* mRNA [19]. Other likely targets post-transcriptionally regulated by the Ccn sRNAs were identified in that study including mRNAs encoding components of a galactose transporter (*spd\_0090*), a formate-nitrate transporter (*nirC*), branched-chain amino acid transporter (*brnQ*) and a toxin (*shetA*), but direct regulation of these targets by the Ccn sRNAs has not yet been established [19]. One

of these five homologous sRNAs, CcnE, has also been implicated in *S. pneumoniae* strain TIGR4 virulence in a murine invasive pneumonia model [12].

Here, we report our discovery of a role for the five Ccn sRNAs in controlling *S. pneumoniae* virulence and Zn resistance. Specifically, we show that deletion of the genes encoding the five Ccn sRNAs attenuates the virulence of *S. pneumoniae* strains D39 and TIGR4 in a murine invasive pneumonia model. Additionally, we show that loss of the Ccn sRNAs leads *S. pneumoniae* D39 and TIGR4 to become hypersensitive to Zn toxicity, and this Zn hypersensitivity is alleviated by supplementation with Mn or Oxyrase, which reduces dissolved oxygen. Altogether, our results indicate that the Ccn sRNAs prevents *S. pneumoniae* Zn intoxication by reducing the intracellular abundance of free Zn, which in turn increases its resistance to oxidative stress under aerobic growth conditions as the result of an increase in the amount of active superoxide dismutase A (SodA).

## Results

### The Ccn sRNAs are important for *S. pneumoniae* pathogenesis

Work from a prior study [12] indicated that deletion of one of the five Ccn sRNA genes (*ccnE*) reduced *S. pneumoniae* serotype 4 strain TIGR4 virulence in a murine invasive pneumonia model. In that study, the authors also discovered by Tn-seq that transposon insertions in *ccnE* reduced *S. pneumoniae* strain TIGR4 fitness in murine lungs, whereas transposon insertions in *ccnA* had no significant impact on its fitness in the murine lung, nasopharynx, or blood. To determine the contribution of the Ccn sRNAs to *S. pneumoniae* virulence, we initially made single deletions of *ccnA*, *ccnB*, *ccnC*, *ccnD*, or *ccnE* and a quintuple deletion of all five *ccn* genes in the archetypal serotype 2 *S. pneumoniae* strain D39, which causes rapid killing of mice by sepsis [20]. We then determined the consequence of these deletions on *S. pneumoniae* pathogenicity in a murine invasive pneumonia model (see [Materials and Methods](#)). While removal of any single *ccn* gene had no significant impact on its virulence in mice (S1 Fig), deletion of all five *ccn* genes attenuated *S. pneumoniae* strain D39 pathogenicity increasing median survival time from 43 h to 67 h (Fig 1A). Mice that ultimately succumbed to pneumococcal

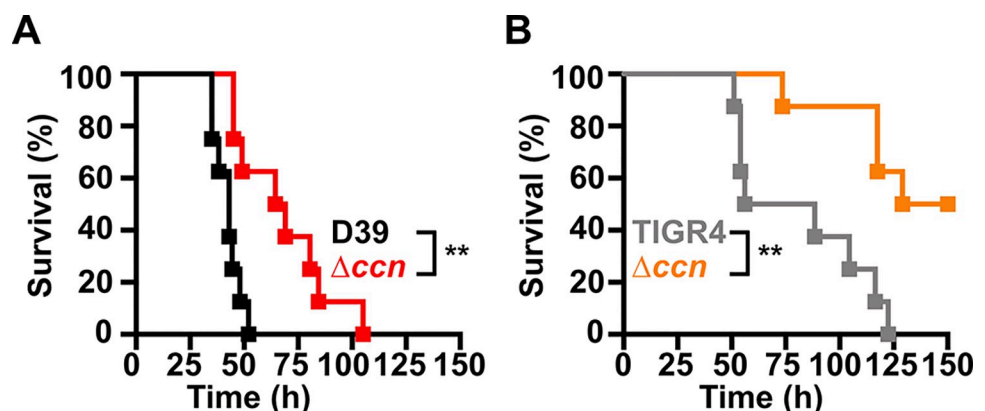

**Fig 1. Virulence phenotypes of *S. pneumoniae* strains harboring deletion of the *ccn* genes.** Survival curve of ICR outbred mice after infection with  $\sim 10^7$  CFU in a 50  $\mu$ L inoculum of the following *S. pneumoniae* strains: (A) IU1781 (D39 *rpsL1*) and NRD10176 ( $\Delta ccn$  *rpsL1*); (B) NRD10220 (TIGR4 *rpsL1*) and NRD10266 ( $\Delta ccn$  *rpsL1*). The difference in median survival time of IU1781 vs NRD10176 (43.0 h vs 66.8 h) and NRD10220 vs NRD10266 (72.3 h vs 139.5 h) were statistically significant. Eight mice were infected per strain. Disease progression of animals was monitored, the time at which animals reached a moribund state was recorded, and these mice were subsequently euthanized as described in Materials and Methods. A survival curve was generated from this data and analyzed by Kaplan-Meier statistics and log rank test to determine P-values, which are indicated as \*\* ( $P < 0.005$ ).

<https://doi.org/10.1371/journal.ppat.1012165.g001>

infection had  $\sim 10^{10}$  colony forming units of *S. pneumoniae* per mL of blood regardless of whether any of the *ccn* genes were deleted.

To confirm that the *ccn* genes are generally important for *S. pneumoniae* virulence and is not an attribute specific to strain D39, we also deleted all five *ccn* genes from the serotype 4 TIGR4 strain and measured the impact of these deletions on its virulence using the same murine invasive pneumonia model. We used strain TIGR4 for these experiments as it belongs to a different major phylogenetic lineage than strain D39 [21] and has a different disease progression in mice with a propensity to cause meningitis rather than sepsis [20]. Regardless, the *ccnABCDE* deletion also resulted in a marked attenuation of *S. pneumoniae* TIGR4 virulence increasing the survival rate of ICR outbred mice from 0% to 50% (Fig 1B). While there was no significant difference in the CFUs of *S. pneumoniae* TIGR4 and the derived  $\Delta ccnABCDE$  mutant in the blood of moribund mice, two of the mice that survived infection with the TIGR4  $\Delta ccnABCDE$  strain had no detectable bacteria in the blood and the other two mice had 1,000 and 2,750 CFUs per mL of blood, respectively, which was far below  $\sim 10^7$  bacteria found in moribund mice that were infected with the *ccn*<sup>+</sup> parent strain. Our results show that the *ccn* genes are important for *S. pneumoniae* pathogenesis.

### The Ccn sRNAs impact expression of Zn-related genes

To discover a basis for the defect in *S. pneumoniae* virulence caused by deletion of the five *ccn* genes, we compared global gene expression by high throughput RNA-sequencing (RNA-seq) between *S. pneumoniae* strain D39 or TIGR4 and the derived  $\Delta ccnABCDE$  mutant strains grown to exponential phase (OD<sub>620</sub> between 0.15 and 0.2) in BHI broth at 37°C in an atmosphere of 5% CO<sub>2</sub>. In the *S. pneumoniae* D39 strain background, the *ccnABCDE* deletion resulted in down-regulation of 3 genes and up-regulation of 113 genes by 2-fold or more ( $P_{adj} < 0.05$ ) (S3 Table). In contrast, deletion of the *ccn* genes from the TIGR4 strain resulted in down-regulation of 25 genes and up-regulation of 97 genes by 2-fold or greater ( $P_{adj} < 0.05$ ) (S4 Table). 37 genes were up-regulated by 2-fold ( $P_{adj} < 0.05$ ) in the *ccnABCDE* deletion strain in both the D39 and TIGR4 backgrounds (Table 1); among these differentially expressed genes were iron uptake system genes (*piuB*, *piuC*, *piuD*, and *piuA*), a Zn-responsive ECF (energy-coupling factor) transport gene SPD\_1267/SP\_1438, and *czcD* encoding a Zn/Cd exporter that provides Zn and Cd resistance. To validate our RNA-seq data, we first measured abundance of *piuB*, *spd\_1267*, and *czcD* transcripts in RNA samples isolated for the RNA-seq experiment from *S. pneumoniae* strain D39 and derived  $\Delta ccnABCDE$  strain by reverse transcriptase droplet digital PCR (RT-ddPCR). Consistent with our RNA-seq data the *piuB*, *spd\_1267*, and *czcD* transcripts were up-regulated by 3.5, 10.5, and 1.9-fold respectively in the  $\Delta ccnABCDE$  strain compared to its parental D39 strain grown in BHI broth (Fig 2A, 2B, and 2C). Using RT-ddPCR analysis of the RNA samples isolated from exponential phase cultures of *S. pneumoniae* TIGR4 and derived  $\Delta ccnABCDE$  mutant strain grown in BHI broth at 37°C under an atmosphere of 5% CO<sub>2</sub>, we only observed a 1.3-fold increase in the abundance of the *czcD* mRNA in the *ccn* mutant as compared to its parental strain (Fig 2D). In *S. pneumoniae*, Zn homeostasis is intertwined with that of Mn. The ratio of Mn relative to Zn can determine whether or not a Mn- or Zn-dependent enzyme or regulator will be metalated with Mn and/or Zn, and hence be functional or inert [22–27]. In the instance of *czcD*, its transcription is activated by the transcriptional regulator SczA, when the intracellular ratio of Zn to Mn is high [24]. Thus, these RNA-seq data suggested to us that removal of the *ccn* genes from *S. pneumoniae* was leading to an increase in the intracellular free Zn concentration relative to Mn, and to cope with this stress, the *ccn* mutant strain was increasing expression of the CzcD Zn exporter.

**Table 1. Genes significantly, differentially expressed between a  $\Delta ccnABCDE$  and  $ccn^+$  strain in both the *S. pneumoniae* D39 and TIGR4 background during exponential growth in BHI broth<sup>a</sup>.**

| D39 locus tag | Gene          | Known or predicted function                         | D39 fold change | TIGR4 fold change |
|---------------|---------------|-----------------------------------------------------|-----------------|-------------------|
| SPD_0025      |               | tRNA-specific adenosine-34 deaminase                | 84.3            | 144               |
| SPD_0027      | <i>dut</i>    | deoxyuridine 5'-triphosphate nucleotidohydrolase    | 3.52            | 4.39              |
| SPD_0028      |               | hypothetical protein                                | 3.80            | 3.40              |
| SPD_0029      | <i>radA</i>   | DNA repair protein                                  | 3.55            | 2.80              |
| SPD_0090      |               | galactose ABC transport protein                     | 2.09            | 2.00              |
| SPD_0104      |               | aggregation-promoting factor                        | 2.69            | 2.27              |
| SPD_0222      | <i>gpmB1</i>  | phosphoglycerate mutase family protein              | 25.0            | 22.9              |
| SPD_0243      | <i>uppS</i>   | undecaprenyl diphosphate synthase                   | 5.97            | 4.42              |
| SPD_0244      | <i>cdsA</i>   | phosphatidate cytidyltransferase                    | 5.50            | 4.49              |
| SPD_0245      | <i>eep</i>    | intramembrane protease                              | 5.57            | 4.19              |
| SPD_0246      | <i>proS</i>   | prolyl-tRNA synthetase                              | 5.91            | 4.68              |
| SPD_0247      | <i>bglA</i>   | 6-phospho- $\beta$ -glucosidase                     | 3.57            | 3.35              |
| SPD_0308      | <i>clpL</i>   | ATP-dependent protease subunit                      | 13.7            | 2.71              |
| SPD_0460      | <i>dnaK</i>   | protein chaperone                                   | 3.97            | 2.01              |
| SPD_0501      | <i>licT</i>   | $\beta$ -glucoside operon antiterminator            | 2.91            | 4.77              |
| SPD_0502      | <i>bglF</i>   | $\beta$ -glucoside PTS transporter subunit          | 3.07            | 5.65              |
| SPD_0503      | <i>bglA-2</i> | 6-phospho- $\beta$ -glucosidase                     | 2.57            | 4.79              |
| SPD_0615      | <i>glnH3</i>  | degenerate glutamine ABC transporter subunit        | 11.6            | 4.05              |
| SPD_0616      | <i>glnQ3</i>  | glutamine ABC transporter subunit                   | 8.90            | 3.07              |
| SPD_0617      | <i>glnP3b</i> | glutamine ABC transporter subunit                   | 11.1            | 3.63              |
| SPD_0618      | <i>glnP3a</i> | glutamine ABC transporter subunit                   | 11.8            | 2.98              |
| SPD_0775      |               | acetyltransferase                                   | 3.29            | 2.71              |
| SPD_1045      |               | degenerate DUF3884 domain protein                   | 4.73            | 3.16              |
| SPD_1046      | <i>lacG-2</i> | 6-phospho- $\beta$ -galactosidase                   | 3.56            | 2.92              |
| SPD_1267      |               | ECF transporter subunit                             | 11.1            | 2.14              |
| SPD_1638      | <i>czcD</i>   | Cd/Zn exporter                                      | 2.69            | 2.66              |
| SPD_1649      | <i>piuB</i>   | Fe uptake transporter subunit                       | 5.13            | 2.43              |
| SPD_1650      | <i>piuC</i>   | Fe uptake transporter subunit                       | 4.45            | 2.01              |
| SPD_1651      | <i>piuD</i>   | Fe uptake transporter subunit                       | 4.22            | 2.15              |
| SPD_1652      | <i>piuA</i>   | Fe uptake transporter subunit                       | 4.38            | 2.25              |
| SPD_1748      | <i>pneA2</i>  | lantibiotic peptide                                 | 2.19            | 2.16              |
| SPD_1749      | <i>lanM</i>   | lanthionine biosynthesis protein                    | 2.49            | 2.29              |
| SPD_1750      | <i>wrbA</i>   | FAD-dependent flavoprotein                          | 3.00            | 2.69              |
| SPD_1751      |               | hypothetical protein                                | 2.56            | 3.16              |
| SPD_1752      | <i>clyB</i>   | toxin secretion ABC transporter                     | 3.58            | 3.22              |
| SPD_1753      |               | epidermin leader peptide processing serine protease | 2.44            | 2.87              |
| SPD_1932      | <i>malP</i>   | malodextrin phosphorylase                           | 2.58            | 2.58              |

<sup>a</sup>RNA extraction and mRNA-seq analyses were performed as described in *Materials and Methods*. RNA was prepared from cultures of strains IU1781 (D39 *rpsL1*), NRD10176 (D39 *rpsL1*  $\Delta ccnABCDE$ ), NRD10220 (TIGR4 *rpsL1*), and NRD10266 (TIGR4 *rpsL1*  $\Delta ccnABCDE$ ) (S1 and S2 Tables). Fold changes (2.0-fold cut-off) and adjusted P-values (Pval <0.05) are based on three independent biological replicates.

<https://doi.org/10.1371/journal.ppat.1012165.t001>

## Absence of the *ccn* genes causes *S. pneumoniae* to become hypersensitive to Zn

If the absence of the *ccn* genes from *S. pneumoniae* leads to an imbalance of transition metals with higher intracellular levels of free Zn relative to Mn, then we would expect that increasing the concentration of Zn present in the medium would disproportionately impair the growth of



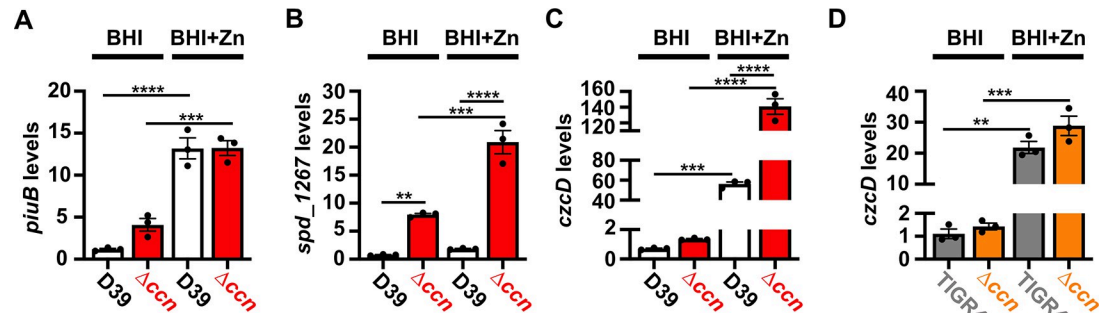

**Fig 2. Loss of the *ccn* genes perturbs the expression of Zn and Mn stress associated genes in *S. pneumoniae*.** Abundance of *piuB* (A), *spd\_1267* (B), and *czcD* (C, D) mRNAs was determined by RT-ddPCR as described in Materials and Methods for strain IU1781 (D39) and derived  $\Delta ccnABCDE$  mutant strain (NRD10176;  $\Delta ccn$ ) (A, B, and C) or strain NRD10220 (TIGR4) and derived  $\Delta ccnABCDE$  mutant strain NRD10266 ( $\Delta ccn$ ) (D) grown to exponential phase ( $OD_{620}$  of  $\sim 0.2$ ) in BHI broth alone (BHI) or supplemented with 0.2 mM  $ZnSO_4$  (BHI+Zn) at 37 °C under an atmosphere of 5%  $CO_2$ . Transcript levels were normalized to *tuf* mRNA. Values represent the mean of three independent cultures and error bars indicate SEM. Statistical analysis was performed by ANOVA, and statistically significant results are indicated by \* (P < 0.005), \*\* (P < 0.0005) or \*\*\*\* (P < 0.0001).

<https://doi.org/10.1371/journal.ppat.1012165.g002>

the  $\Delta ccnABCDE$  mutant relative to the isogenic  $ccn^+$  strain. Previous studies have indicated that Becton-Dickinson (BD) BHI broth typically contains  $\sim 20$   $\mu M$  Zn and 200 nM Mn [25,28]. We first compared growth of strain D39 and derived  $\Delta ccnA$ ,  $\Delta ccnB$ ,  $\Delta ccnC$ ,  $\Delta ccnD$ ,  $\Delta ccnE$ , and  $\Delta ccnABCDE$  strains in BHI broth alone or supplemented with 0.2 mM Zn at 37 °C under an atmosphere of 5%  $CO_2$ . No significant difference was observed in growth rate between strain D39 and derived  $\Delta ccnA$ ,  $\Delta ccnB$ ,  $\Delta ccnC$ , and  $\Delta ccnD$  mutant strains in BHI in the presence or absence of 0.2 mM added Zn (S2A–S2D Fig), although the growth yield for the  $ccnE$  mutant was lower in BHI in the presence or absence of Zn. Growth of strain D39 and the derived  $\Delta ccnABCDE$  mutant was similar in BHI broth alone (Fig 3A)

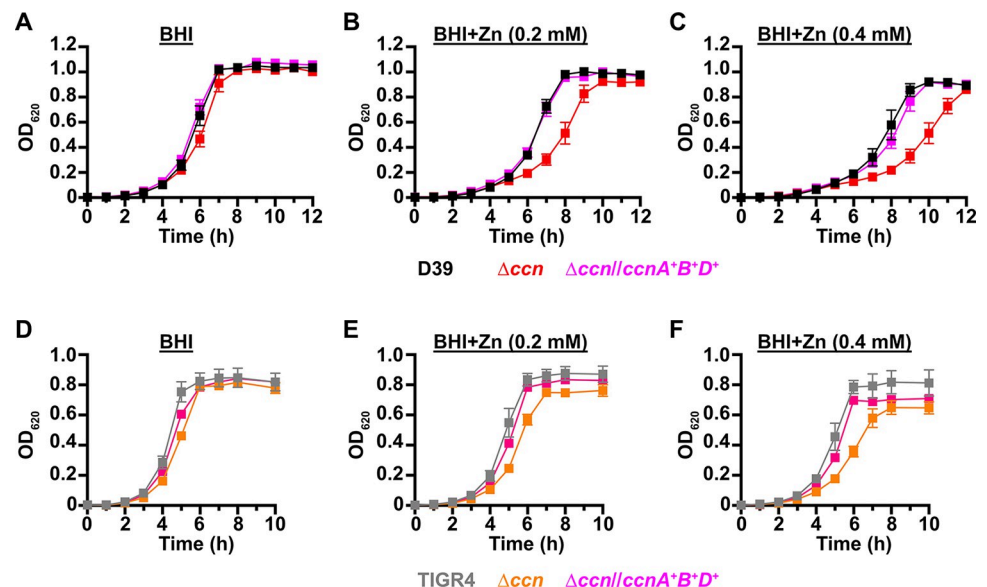

**Fig 3. Growth phenotypes of *S. pneumoniae* strains harboring deletion of the *ccn* genes.** Growth characteristics at 37 °C under an atmosphere of 5%  $CO_2$  in BHI broth alone (A, D) or with 0.2 mM (B, E) or 0.4 mM (C, F)  $ZnSO_4$  of following strains: (A, B, C) IU1781 (D39), NRD10176 ( $\Delta ccn$ ), and NRD10396 ( $\Delta ccn/ccnA^+B^+D^+$ ); (D, E, F) NRD10220 (TIGR4) NRD10266 ( $\Delta ccn$ ), and NRD10787 ( $\Delta ccn/ccnA^+B^+D^+$ ). Each point on the graph represents the mean  $OD_{620}$  value from three independent cultures. Error bars, which in some cases are too small to observe in the graph, represent the standard deviation (SD).

<https://doi.org/10.1371/journal.ppat.1012165.g003>

In contrast, the absence of all five *ccn* genes led to an obvious impairment in growth rate in BHI supplemented with 0.2 mM Zn (Fig 3B). This growth deficiency relative to the *ccn*<sup>+</sup> parental strain was also observed for the  $\Delta ccnABCDE$  strain when Zn was increased in BHI broth to 0.4 mM (Fig 3C). Consistently, addition of Zn at 0.4 mM severely reduced the growth rate of the *ccn*<sup>+</sup> D39 strain. We then constructed a set of strains in which every possible combination of three or four *ccn* genes are deleted and tested their growth in BHI broth alone or supplemented with 0.2 mM Zn (S2 Fig). In summary, we found that each of the strains containing only a single *ccn* gene (*ccnA*, *ccnB*, *ccnC*, *ccnD*, or *ccnE*) was defective in growth in BHI broth supplemented with Zn, but grew similar to the *ccn*<sup>+</sup> parental strain in BHI broth alone (S2M–S2P Fig). Out of all of the strains containing only two of the five *ccn* genes, the strains expressing *ccnA* and *ccnB* ( $\Delta ccnCDE$ ) or *ccnC* and *ccnD* ( $\Delta ccnABE$ ) grew most similar to the *ccn*<sup>+</sup> parental strain in BHI broth supplemented with Zn (S2E–S2L Fig).

Thus, we tested whether introduction of *ccnA* and *ccnB* or *ccnC* and *ccnD* expressed from their native promoters at ectopic loci restored growth of the  $\Delta ccnABCDE$  mutant strain to that of the *ccn*<sup>+</sup> parental strain in BHI broth with 0.2 mM added Zn, but only partial complementation was achieved (S3 Fig). Therefore, we examined whether inserting genes for three Ccn sRNAs (*ccnA*, *ccnB*, and *ccnD*) with their native promoter at ectopic loci could completely correct the Zn-dependent growth deficiency of the  $\Delta ccnABCDE$  mutant strain, and it did (Fig 3). To verify that the Zn hypersensitivity caused by the deletion of all five *ccn* genes was not specific to the serotype 2 strain D39, we also tested the effect of the quintuple *ccn* deletion on the growth of the serotype 4 TIGR4 strain in BHI broth supplemented with Zn. Consistent with our results observed for strain D39, deletion of the *ccn* genes from TIGR4 led to growth impairment in BHI broth when Zn was added at a final concentration of 0.2 or 0.4 mM (Figs 3D–3F and S4). Moreover, the Zn dependent growth impairment of the  $\Delta ccnABCDE$  mutant TIGR4 strain could also be fully ameliorated by ectopic expression of *ccnA*, *ccnB*, and *ccnD* (Fig 3). Curiously, Zn at the highest concentration used had less of an effect on strain TIGR4 growth than it did on strain D39. Overall, these results indicate that Ccn sRNAs promote *S. pneumoniae* Zn tolerance.

### In the absence of the Ccn sRNAs, *S. pneumoniae* accumulates bioavailable Zn

*S. pneumoniae* is a Mn-centric bacteria encoding several Mn-requiring enzymes including superoxide dismutase (SodA), a capsule regulatory kinase (CpsB), phosphoglucomutase (Pgm), phosphopentomutase (DeoB), a cell division regulating phosphatase (PhpP), an aerobic ribonucleotide reductase (NrdEF), pyruvate kinase (PyK), and lactate dehydrogenase (Ldh). Mis-metalation of these Mn-dependent enzymes by Zn, which inhibits their enzymatic activity [22,27], can occur when the internal ratio of bioavailable Zn-to-Mn is high. Additionally, the substrate binding component of the PsaBCA Mn ATP binding cassette (ABC) type transporter, the only known Mn importer in *S. pneumoniae*, has been shown to bind Zn tightly, blocking Mn uptake [26,28]. Our RNA-seq data above indicated that expression of the CzcD Zn exporter, which is expressed in response to high levels of free, or bioavailable, Zn relative to Mn [24,29], is up-regulated in *S. pneumoniae* strains lacking the *ccn* genes (Table 1 and Fig 2C and 2D). Based on these results and the published data mentioned above, we hypothesized that Zn-hypersensitivity caused by the removal of all five *ccn* genes from the *S. pneumoniae* genome is due to an increase in free Zn concentration relative to Mn. If this postulate is correct, then the Zn-dependent growth inhibition that occurs when the *S. pneumoniae*  $\Delta ccnABCDE$  mutant strain is grown in BHI broth supplemented with 0.2 mM Zn should be rescued by inclusion of an equimolar amount of Mn into the medium. As shown in Fig 4, the growth impairment of

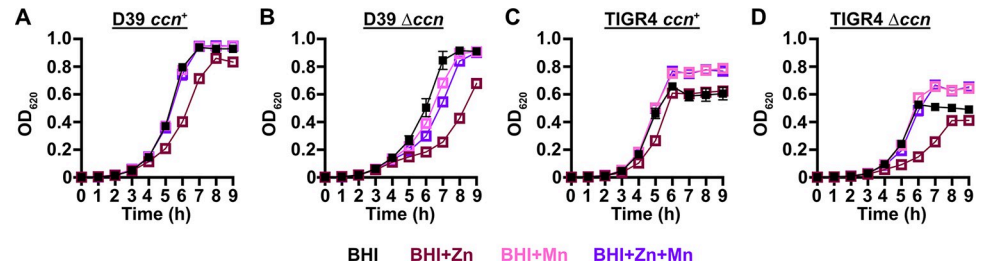

**Fig 4. Mn supplementation eliminates the Zn dependent growth inhibition of *S. pneumoniae*  $\Delta ccnABCDE$  mutant.** Growth characteristics at 37°C under an atmosphere of 5% CO<sub>2</sub> in BHI broth alone (BHI) or with 0.2 mM ZnSO<sub>4</sub> (BHI+Zn), 0.2 mM MnCl<sub>2</sub> (BHI+Mn), or 0.2 mM ZnSO<sub>4</sub> and MnCl<sub>2</sub> (BHI+Zn+Mn) of strains (A) IU1781 (D39 *ccn*<sup>+</sup>), (B) NRD10176 (D39  $\Delta ccn$ ), (C), NRD10220 (TIGR4 *ccn*<sup>+</sup>), and (D) NRD10266 (TIGR4  $\Delta ccn$ ). Each point on the graph represents the mean OD<sub>620</sub> value from three independent cultures. Error bars, which in some cases are too small to observe in the graph, represent the standard deviation (SD).

<https://doi.org/10.1371/journal.ppat.1012165.g004>

the  $\Delta ccnABCDE$  mutant of *S. pneumoniae* D39 or TIGR4 strain in BHI broth with 0.2 mM Zn is cured by addition of 0.2 mM Mn consistent with our model.

To directly test whether or not the levels of transition metals are perturbed in strains lacking the *ccn* genes, we measured total cell-associated transition metals in *S. pneumoniae* strain D39, derived  $\Delta ccnABCDE$  mutant, and the  $\Delta ccnABCDE$  strain complemented with *ccnA*, *ccnB*, and *ccnD* grown in BHI broth or the chemically defined C medium by inductively coupled plasma-mass spectrometry (ICP-MS). During exponential growth (OD<sub>620</sub> of ~0.2) in BHI broth alone or supplemented with 0.2 mM Zn, there was no significant difference in total cell-associated Zn among these strains (Fig 5A and 5B and Table 2). However, it remains possible that there was a difference in the amount of bioavailable, or unbound, Zn as our ICP-MS based approach measures the total amount of cell associated metals and does not discriminate between protein-bound vs unbound metals.

Since we were unable to detect a difference in Zn or Mn content among the *S. pneumoniae* strain D39 strain,  $\Delta ccnABCDE$  mutant, and derived strain complemented with *ccnA*, *ccnB*, and *ccnD* in BHI broth, we then assessed their abundance when these strains were grown in a defined liquid medium (C-medium). Similar to what was observed in BHI broth supplemented with Zn, we found that  $\Delta ccnABCDE$  mutant had a slower growth rate, or longer doubling time, than its parental *ccn*<sup>+</sup> *S. pneumoniae* D39 strain in C-medium supplemented with 0.2 mM ZnSO<sub>4</sub> (65 min vs 56 min), but not in C-medium alone (47 min vs 42 min) as shown in S5 Fig. Next, we measured total cell-associated Zn and Mn of the aforementioned strains under these growth conditions, and we observed a statistically significant difference ( $P < 0.05$ ) in the median Zn abundance between the *S. pneumoniae* strain D39 and derived  $\Delta ccnABCDE$  mutant grown in C-medium alone (183% increase) or supplemented with Zn (144% increase) (Fig 5C and 5D and Table 2). Complementation of the  $\Delta ccnABCDE$  mutant with *ccnA*, *ccnB*, and *ccnD* did not restore Zn levels to that of its parental strain signaling that all five *ccn* genes may be needed to maintain proper Zn homeostasis. No statistically significant difference in total cell-associated Mn was observed between *S. pneumoniae* strain D39 and derived  $\Delta ccnABCDE$  mutant under any of the tested growth conditions (Fig 5B and 5D and Table 2). Thus, our evidence that Mn supplementation eliminated the growth deficiency of the *ccn*<sup>-</sup> strain caused by excess Zn (Fig 4), that there was increased expression of *czcD* encoding a Zn exporter when the *ccn* genes were removed from *S. pneumoniae* strains D39 and TIGR4 (Tables 1, S3, and S4), and that the amount of Zn associated with the  $\Delta ccnABCDE$  mutant strain was higher compared to the *ccn*<sup>+</sup> strain in C-medium (Fig 5 and Table 2) suggest that the Ccn sRNAs are important for preserving Zn homeostasis in *S. pneumoniae*.



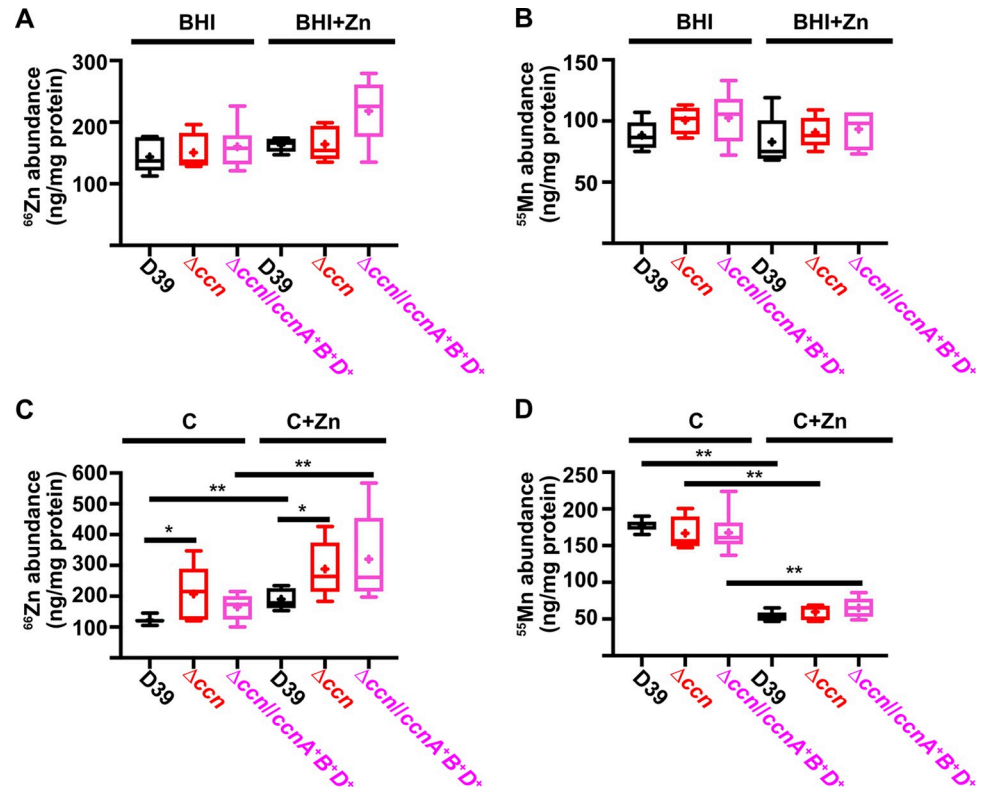

**Fig 5. Deletion of the *ccn* genes increases total cell-associated Zn levels, but not Mn levels, in C medium.** Total cell associated Zn (A, C) and Mn (B, D) abundance was measured from cells harvested from cultures of IU781 (D39), NRD10176 ( $\Delta ccn$ ), and NRD10396 ( $\Delta ccn/ccnA^+B^+D^+$ ) grown to exponential growth phase ( $OD_{620}$  of  $\sim 0.2$ ) in BHI broth (BHI) or BHI broth with 0.2 mM  $ZnSO_4$  (BHI+Zn) (A and B) or in C medium or C medium with 0.2 mM  $ZnSO_4$  (C+Zn) (C and D) by ICP-MS and normalized to protein amounts. Results presented in box and whisker plots represent the median of 5 to 8 replicates with whiskers indicating the 5–95% percentile. Means are indicated by “+”. Statistical analysis was performed using a Mann-Whitney test, and statistically significant results are indicated by \* ( $P < 0.05$ ) or \*\* ( $P < 0.05$ ).

<https://doi.org/10.1371/journal.ppat.1012165.g005>

### Oxidative stress due to reduced levels of active superoxide dismutase A contributes to the Zn hypersensitivity of the *S. pneumoniae* strain lacking the Ccn sRNAs

To discover the molecular basis for the Zn hypersensitivity caused by loss of the *ccn* genes, we turned to an RNA-seq based approach. Briefly, we compared transcript abundance in RNA

**Table 2. Total cell-associated Zn and Mn abundance of *S. pneumoniae* strain D39 and derived  $\Delta ccnABCDE$  strains grown in BHI broth or C medium alone or with Zn supplementation<sup>a</sup>.**

| Strain                                 | BHI          |               | BHI + Zn     |              | C            |              | C + Zn       |            |
|----------------------------------------|--------------|---------------|--------------|--------------|--------------|--------------|--------------|------------|
|                                        | Zn           | Mn            | Zn           | Mn           | Zn           | Mn           | Zn           | Mn         |
| IU1781 (WT)                            | 140 ± 11 (6) | 88 ± 4.9 (6)  | 160 ± 5 (5)  | 83 ± 9.4 (5) | 120 ± 4 (8)  | 180 ± 3 (8)  | 190 ± 15 (5) | 53 ± 3 (5) |
| NRD10176 ( $\Delta ccn$ )              | 150 ± 12 (6) | 100 ± 4.4 (6) | 160 ± 13 (5) | 91 ± 5.7 (5) | 210 ± 41 (5) | 170 ± 10 (5) | 290 ± 41 (5) | 60 ± 5 (5) |
| NRD10396 ( $\Delta ccn/ccnA^+B^+D^+$ ) | 160 ± 15 (6) | 100 ± 8.6 (6) | 220 ± 21 (6) | 93 ± 6.1 (6) | 170 ± 17 (6) | 170 ± 12 (6) | 320 ± 66 (5) | 65 ± 6 (5) |

<sup>a</sup>The indicated strains were cultured and ICP-MS analyses of metal abundance of cells harvested from these cultures was performed as described in *Materials and Methods*. Shown are the mean values of the Zn and Mn abundance normalized to protein levels (ng/mg of protein) followed by the standard error of the mean. Number of biological replicates is indicated in parentheses. The median values of Zn and Mn abundance from these experiments are shown in Fig 5.

<https://doi.org/10.1371/journal.ppat.1012165.t002>

isolated from *S. pneumoniae* strain D39 and derived  $\Delta ccnABCDE$  strain grown to exponential phase ( $OD_{620}$  of  $\sim 0.2$ ) at  $37^\circ\text{C}$  under an atmosphere of 5%  $\text{CO}_2$  in BHI broth supplemented with 0.2 mM Zn. Similar to our RNA-seq experiments performed with these strains in the absence of Zn supplementation, we observed a 2.3-fold increase in expression of the CzcD Zn exporter specifying mRNA and a 9.5-fold increase in the Spd\_1267 Zn-responsive ECF-type transporter producing mRNA in the  $\Delta ccnABCDE$  mutant compared to its  $ccn^+$  parent strain (Tables 3 and S5). Additionally, we observed a significant increase in expression of *nrdD* (2.8-fold) and *nrdG* (2.7-fold) encoding the components of the Mn-independent, anaerobic form of ribonucleotide reductase (S5 Table). We validated these results by RT-ddPCR and detected a 2.5-fold and 10.6-fold up-regulation of *czcD* and *spd\_1267*, respectively, in the  $\Delta ccnABCDE$  mutant relative to the  $ccn^+$  D39 strain (Fig 2B and 2C). Interestingly, we also saw a 1.9-fold decrease ( $P_{\text{adj}} = 1.81 \times 10^{-43}$ ) in expression of the *sodA* mRNA, encoding superoxide dismutase A, in the  $\Delta ccnABCDE$  mutant strain, which was just below our arbitrary two-fold cutoff (S5 Table). We subsequently measured the relative abundance of the *sodA* transcript by northern blot analysis (Fig 6) and consistently observed down-regulation of the *sodA* mRNA when the *ccn* genes were deleted from *S. pneumoniae* during growth in BHI broth supplemented with Zn. This result was intriguing to us since a prior study found that Mn starvation of *S. pneumoniae* cells due to exposure to high concentrations of Zn relative to Mn led to a reduction in transcription of *sodA* and a reduction in superoxide dismutase activity [22]. Furthermore, Eijkelkamp *et al* discovered that deletion of *sodA* had no significant impact on *S. pneumoniae* growth under Mn replete conditions, but was vital for growth in media containing a high Zn-to-Mn ratio [22].

To initially examine whether the growth deficiency of the  $\Delta ccnABCDE$  mutant relative to the  $ccn^+$  D39 strain was due in part to oxidative stress, we evaluated the impact of addition of Oxyrase, an enzyme mixture that removes molecular oxygen by reducing it to water, on the growth of these strains in BHI broth alone or supplemented with 0.2 mM or 0.4 mM Zn (Fig 7A, 7B, and 7C) under an atmosphere of 5%  $\text{CO}_2$ . Once again, we observed that deletion of *ccnA*, *ccnB*, *ccnC*, *ccnD*, and *ccnE* from *S. pneumoniae* strain D39 had no significant impact on growth in BHI alone. However, under these growth conditions, the addition of Oxyrase reduced the growth rate of both the  $ccn^+$  and  $ccn^-$  strains to a similar extent (Fig 7A). As we anticipated, addition of Oxyrase to BHI supplemented with Zn (0.2 mM) improved the growth rate of the  $\Delta ccnABCDE$  strain to that observed for the  $ccn^+$  D39 parent strain (Fig 7B). Interestingly, addition of Oxyrase improved the growth rate of both strains in BHI with 0.4 mM Zn and eliminated any growth differences between them (Fig 7C). Finally, we examined the contribution of *sodA* to the growth of *S. pneumoniae* D39 and derived  $\Delta ccnABCDE$  mutant strain. In BHI broth alone or supplemented with 0.2 mM Zn, deletion of *sodA* reduced the growth rate of the  $ccn^+$  strain, but did not result in a significant reduction in growth rate of the  $\Delta ccnABCDE$  mutant strain (Fig 8). Based on these results, we concluded that the amount of functional SodA was negligible in the *S. pneumoniae* strain lacking the Ccn sRNAs and thus, deleting *sodA* did not significantly impact its growth, whereas this deletion did impair growth of the isogenic  $ccn^+$  strain.

## Discussion

High density Tn-seq experiments performed more than a decade ago revealed that sRNAs play a crucial role in regulating *S. pneumoniae* virulence including its ability to colonize the blood, nasopharynx, and lungs of its host [12]. While this discovery in itself may not be surprising, it is astonishing that very little progress has been made towards understanding the functions of these sRNAs given their importance in governing *S. pneumoniae* pathogenesis. Here, we

Table 3. Genes significantly, differentially expressed between a *S. pneumoniae* D39 and derived  $\Delta$ ccnABCDE strain in both BHI alone or supplemented with Zn<sup>a</sup>.

| D39 locus tag | Gene          | Known or predicted function                          | Fold change (BHI) | Fold change (BHI+Zn) |
|---------------|---------------|------------------------------------------------------|-------------------|----------------------|
| SPD_0025      |               | tRNA-specific adenosine-34 deaminase                 | 84.3              | 49.0                 |
| SPD_0027      | <i>dut</i>    | deoxyuridine 5'-triphosphate nucleotidohydrolase     | 3.52              | 3.76                 |
| SPD_0028      |               | hypothetical protein                                 | 3.80              | 3.02                 |
| SPD_0029      | <i>radA</i>   | DNA repair protein                                   | 3.55              | 2.95                 |
| SPD_0080      | <i>pavB</i>   | cell wall surface anchor family protein              | 6.69              | 6.32                 |
| SPD_0163      |               | DNA binding protein                                  | 2.00              | 2.07                 |
| SPD_0222      | <i>gpmB1</i>  | phosphoglycerate mutase family protein               | 25.0              | 21.7                 |
| SPD_0243      | <i>uppS</i>   | undecaprenyl diphosphate synthase                    | 5.97              | 7.61                 |
| SPD_0244      | <i>cdsA</i>   | phosphatidate cytidyltransferase                     | 5.50              | 7.77                 |
| SPD_0245      | <i>eep</i>    | intramembrane protease                               | 5.57              | 8.59                 |
| SPD_0246      | <i>proS</i>   | prolyl-tRNA synthetase                               | 5.91              | 9.65                 |
| SPD_0247      | <i>bglA</i>   | 6-phospho- $\beta$ -glucosidase                      | 3.57              | 4.73                 |
| SPD_0277      | <i>bglA-1</i> | 6-phospho- $\beta$ -glucosidase                      | 3.53              | 2.73                 |
| SPD_0279      | <i>celB</i>   | cellobiose PTS transporter subunit                   | 5.05              | 2.97                 |
| SPD_0308      | <i>clpL</i>   | ATP-dependent protease subunit                       | 13.7              | 9.55                 |
| SPD_0350      | <i>vraT</i>   | cell wall-active antibiotic response protein         | 2.19              | 2.62                 |
| SPD_0351      | <i>vraS</i>   | two-component system histidine kinase                | 2.29              | 2.74                 |
| SPD_0352      | <i>vraR</i>   | two-component system response regulator              | 2.31              | 2.70                 |
| SPD_0353      | <i>alkD</i>   | degenerate DNA alkylation repair enzyme              | 2.11              | 2.67                 |
| SPD_0354      | <i>alkD</i>   | degenerate DNA alkylation repair enzyme              | 2.37              | 2.69                 |
| SPD_0458      | <i>hrcA</i>   | heat inducible transcription repressor               | 3.62              | 3.69                 |
| SPD_0459      | <i>grpE</i>   | heat shock protein                                   | 3.77              | 3.87                 |
| SPD_0460      | <i>dnaK</i>   | protein chaperone                                    | 3.97              | 3.82                 |
| SPD_0461      | <i>dnaJ</i>   | protein chaperone                                    | 3.50              | 3.52                 |
| SPD_0474      | <i>blpZ</i>   | immunity protein                                     | 2.40              | 2.05                 |
| SPD_0501      | <i>licT</i>   | $\beta$ -glucoside operon antiterminator             | 2.91              | 5.26                 |
| SPD_0502      | <i>bglF</i>   | $\beta$ -glucoside PTS transporter subunit           | 3.07              | 4.65                 |
| SPD_0503      | <i>bglA-2</i> | 6-phospho- $\beta$ -glucosidase                      | 2.57              | 3.75                 |
| SPD_0537      |               | putative Zn-dependent protease                       | 2.07              | 2.21                 |
| SPD_0615      | <i>glnH3</i>  | degenerate glutamine ABC transporter subunit         | 11.6              | 18.0                 |
| SPD_0616      | <i>glnQ3</i>  | glutamine ABC transporter subunit                    | 8.90              | 16.8                 |
| SPD_0617      | <i>glnP3b</i> | glutamine ABC transporter subunit                    | 11.1              | 15.8                 |
| SPD_0618      | <i>glnP3a</i> | glutamine ABC transporter subunit                    | 11.8              | 15.1                 |
| SPD_0681      |               | hypothetical protein                                 | 2.82              | 5.45                 |
| SPD_0701      | <i>ciaR</i>   | two-component response regulator                     | 2.72              | 2.56                 |
| SPD_0702      | <i>ciaH</i>   | two-component histidine kinase                       | 2.80              | 3.01                 |
| SPD_0775      |               | acetyltransferase                                    | 3.29              | 3.61                 |
| SPD_0803      |               | putative phage shock protein C                       |                   |                      |
| SPD_0804      |               | ABC transporter ATP-binding protein                  | 2.28              | 3.01                 |
| SPD_0805      |               | ABC transporter permease protein                     | 2.43              | 3.15                 |
| SPD_0913      |               | extracellular protein                                | 3.39              | 3.31                 |
| SPD_0938      |               | degenerate TN5252 relaxase                           | 9.35              | 5.06                 |
| SPD_0940      | <i>rrfD</i>   | UDP-N-acetyl-D-mannosaminouronic acid dehydrogenase. | 3.95              | 5.31                 |
| SPD_0942      |               | hypothetical protein                                 | 2.25              | 2.41                 |
| SPD_0943      |               | hypothetical protein                                 | 2.41              | 2.43                 |
| SPD_0944      |               | nodulation protein L                                 | 2.24              | 2.38                 |
| SPD_0946      |               | hypothetical protein                                 | 2.16              | 3.27                 |

(Continued)

Table 3. (Continued)

| D39 locus tag | Gene          | Known or predicted function                         | Fold change (BHI) | Fold change (BHI+Zn) |
|---------------|---------------|-----------------------------------------------------|-------------------|----------------------|
| SPD_0947      |               | hypothetical protein                                | 2.69              | 3.97                 |
| SPD_0948      | <i>nikS</i>   | nikkomycin biosynthesis protein                     | 3.73              | 4.29                 |
| SPD_0949      |               | N-acetylneuraminase synthase                        | 2.38              | 4.85                 |
| SPD_0950      | <i>mefE</i>   | macrolide ABCE transporter subunit                  | 2.44              | 3.99                 |
| SPD_1045      |               | degenerate DUF3884 domain protein                   | 4.73              | 6.81                 |
| SPD_1046      | <i>lacG-2</i> | 6-phospho-b-galactosidase                           | 3.56              | 7.28                 |
| SPD_1047      | <i>lacE-2</i> | lactose PTS transporter subunit                     | 4.21              | 6.33                 |
| SPD_1049      | <i>lacT</i>   | $\beta$ -glucoside <i>bgl</i> operon antiterminator | 3.23              | 3.48                 |
| SPD_1114      |               | hypothetical protein                                | 13.5              | 5.37                 |
| SPD_1267      |               | ECF transporter subunit                             | 11.1              | 9.53                 |
| SPD_1297      | <i>pdxS</i>   | pyridoxal 5'-phosphate synthase                     | 2.02              | 2.04                 |
| SPD_1506      | <i>axe1</i>   | acetyl xylan esterase 1                             | 3.62              | 2.68                 |
| SPD_1615      |               | degenerate hypothetical protein                     | 4.02              | 2.09                 |
| SPD_1638      | <i>czcD</i>   | Cd/Zn exporter                                      | 2.69              | 2.33                 |
| SPD_1709      | <i>groL</i>   | HSP60 family chaperone                              | 2.58              | 2.38                 |
| SPD_1710      | <i>groES</i>  | HSP60 family chaperone                              | 2.25              | 2.31                 |
| SPD_1716      |               | hypothetical protein                                | 2.56              | 5.62                 |
| SPD_1717      |               | membrane protein                                    | 2.40              | 5.22                 |
| SPD_1718      |               | LytR/AlgR family response regulator                 | 2.44              | 4.58                 |
| SPD_1746      |               | hypothetical protein                                | 2.96              | 4.25                 |
| SPD_1747      | <i>pneA1</i>  | lantibiotic peptide                                 | 2.02              | 4.29                 |
| SPD_1748      | <i>pneA2</i>  | lantibiotic peptide                                 | 2.19              | 4.60                 |
| SPD_1749      | <i>lanM</i>   | lanthionine biosynthesis protein                    | 2.49              | 2.37                 |
| SPD_1750      | <i>wrbA</i>   | FAD-dependent flavoprotein                          | 3.00              | 2.85                 |
| SPD_1751      |               | hypothetical protein                                | 2.56              | 4.07                 |
| SPD_1752      | <i>clyB</i>   | toxin secretion ABC transporter                     | 3.58              | 4.02                 |
| SPD_1753      |               | epidermin leader peptide processing serine protease | 2.44              | 3.00                 |
| SPD_1769      |               | membrane protein                                    | 2.29              | 3.42                 |
| SPD_1932      | <i>malP</i>   | malodextrin phosphorylase                           | 2.58              | 2.95                 |
| SPD_1933      | <i>malQ</i>   | 4- $\alpha$ -glucanotransferase                     | 2.76              | 2.77                 |
| SPD_1990      |               | mannose PTS transporter subunit                     | 2.01              | 13.8                 |
| SPD_1994      | <i>fucA</i>   | L-fucose phosphate aldolase                         | 2.35              | 8.69                 |
| SPD_2034      | <i>comFC</i>  | phosphoribosyltransferase domain protein            | 32.7              | 14.1                 |
| SPD_2035      | <i>comFA</i>  | DNA transporter ATPase                              | 8.88              | 10.2                 |
| SPD_2068      | <i>htrA</i>   | serine protease                                     | 2.79              | 2.13                 |
| SPD_2069      | <i>parB</i>   | chromosome partitioning protein                     | 3.04              | 2.88                 |

<sup>a</sup>RNA extraction and mRNA-seq analyses were performed as described in *Materials and Methods*. RNA was prepared from cultures of strains IU1781 (D39 *rpsL1*) and NRD10176 (D39 *rpsL1*  $\Delta$ ccnABCDE) grown to exponential phase in BHI alone or supplemented with 0.2 mM ZnSO<sub>4</sub> (S1 and S2 Tables). Fold changes (2.0-fold cut-off) and adjusted P-values (Pval <0.05) are based on three independent biological replicates.

<https://doi.org/10.1371/journal.ppat.1012165.t003>

investigated the contribution of the five homologous Ccn sRNAs to *S. pneumoniae* pathogenesis and gene regulation. In addition to confirming their crucial role in pneumococcal disease progression (Fig 1), we have discovered their extensive functions in regulating gene expression and Zn resistance. The Zn sensitivity of *S. pneumoniae* strains lacking the Ccn sRNA genes likely contributes to their reduced virulence.

Zn is an important transition metal for *S. pneumoniae* during host infection. Prior work has shown that *S. pneumoniae* requires Zn for pathogenesis as deletion of genes for the Zn

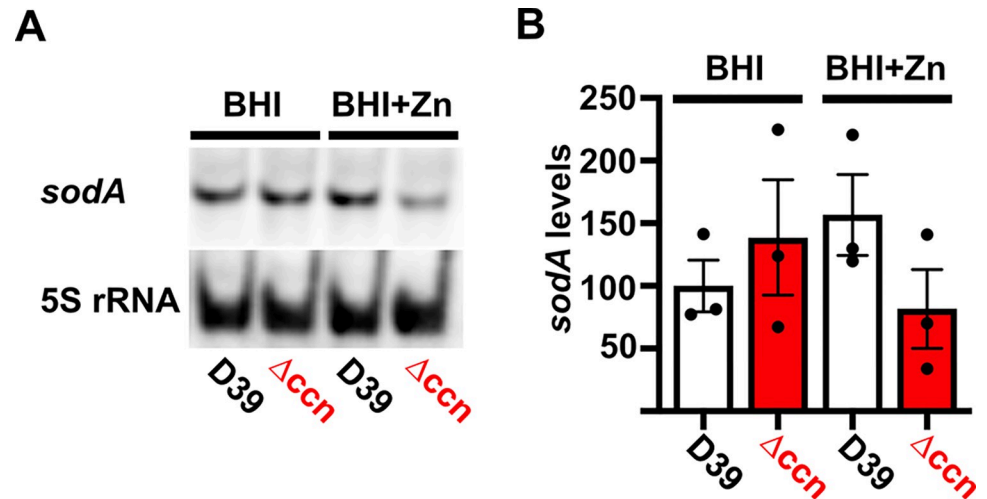

**Fig 6. Effects of the *ccn* genes on expression of *sodA* mRNA.** Levels of the *sodA* mRNA were determined by northern blot analyses as described in Materials and Methods for strain IU1781 (D39) and derived  $\Delta ccn$ ABCDE mutant strain (NRD10176;  $\Delta ccn$ ) grown to exponential phase ( $OD_{620}$  of  $\sim 0.2$ ) in BHI broth alone (BHI) or supplemented with 0.2 mM  $ZnSO_4$  (BHI+Zn) at 37°C under an atmosphere of 5%  $CO_2$ . Representative blots are shown in (A). Levels of *sodA* mRNA normalized to 5S rRNA abundance are presented in (B). Values represent the mean of three independent cultures and error bars indicate SEM.

<https://doi.org/10.1371/journal.ppat.1012165.g006>

binding components of its only known Zn acquisition system (*adcA* and *adcAII*) abolished pneumococcal virulence in murine nasopharyngeal colonization, septicemia, and pneumonia models [30] and reduced pneumococcal burden in lungs, pleural cavity, and blood of mice fed a Zn depleted or replete diet [31]. However, previous studies have also established that *S. pneumoniae* must combat high Zn levels during host infection as deletion of the gene for its only known Zn exporter (*czcD*) also significantly reduced pneumococcal burden in the lungs and blood of mice fed a Zn replete diet following intranasal infection [31]. In that study, Zn levels were shown to increase in the blood, lungs, and nasopharynx of mice following infection with the pneumococcus, and the areas in which Zn were most abundant were regions containing pneumococcal cells [31]. Finally, experiments showing that deletion of *czcD* from *S. pneumoniae* renders it susceptible to killing by macrophage-like cells derived from human Thp-1 cells [31] indicate that Zn is used by phagocytic cells to poison *S. pneumoniae*.

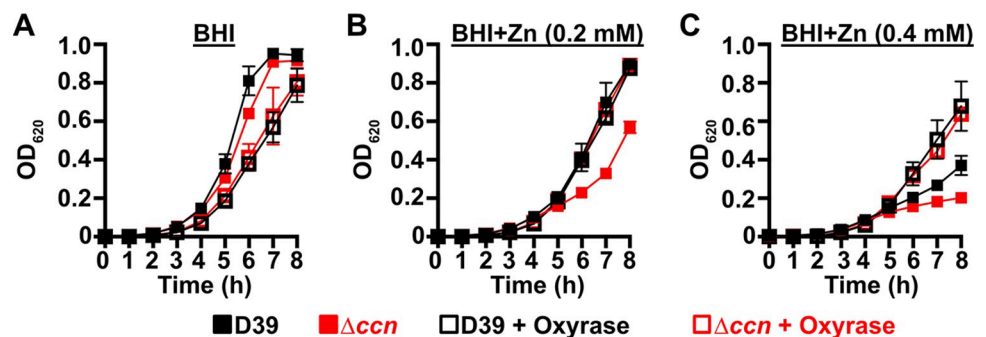

**Fig 7. Reduction of  $O_2$  abolishes the Zn hypersensitivity of the *S. pneumoniae*  $\Delta ccn$ ABCDE mutant.** Growth characteristics at 37°C under an atmosphere of 5%  $CO_2$  in BHI broth alone (A) or with 0.2 mM (B) or 0.4 mM (C)  $ZnSO_4$  of IU1781 (D39) and NRD10176 ( $\Delta ccn$ ) in the absence or presence of 10% (volume/volume) Oxyrase. Each point on the graph represents the mean  $OD_{620}$  value from three independent cultures. Error bars, which in some cases are too small to observe in the graph, represent the standard deviation (SD).

<https://doi.org/10.1371/journal.ppat.1012165.g007>



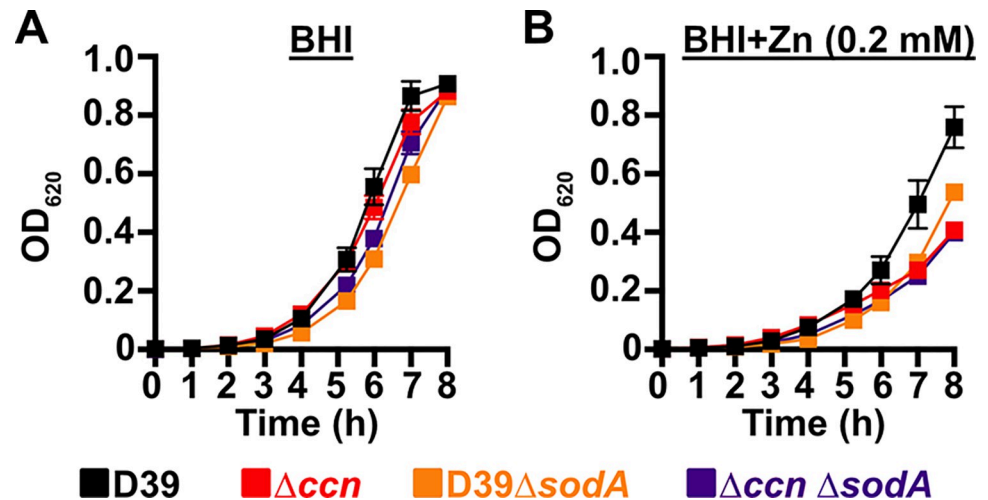

**Fig 8. A *S. pneumoniae*  $\Delta sodA$  mutant phenocopies the Zn hypersensitivity of a  $\Delta ccnABCDE$  mutant strain.** Growth characteristics at 37 C under an atmosphere of 5% CO<sub>2</sub> in BHI broth alone (A) or with 0.2 mM ZnSO<sub>4</sub> (B) of IU781 (D39), NRD10176 ( $\Delta ccn$ ), NRD10533 (D39 $\Delta sodA$ ), and NRD10534 ( $\Delta ccn \Delta sodA$ ). Each point on the graph represents the mean OD<sub>620</sub> value from three independent cultures. Error bars, which in some cases are too small to observe in the graph, represent the standard deviation (SD).

<https://doi.org/10.1371/journal.ppat.1012165.g008>

In our work presented here, we found that exposure to relatively high, yet host-relevant, Zn concentrations (0.2 mM) disproportionately inhibited *S. pneumoniae*  $\Delta ccnABCDE$  mutant strain growth in BHI broth (Fig 3, 4, 7, and 8) and increased total cell-associated Zn levels (Fig 5 and Table 2) of *S. pneumoniae* strains lacking genes for the five Ccn sRNAs grown in C-medium alone or supplemented with 0.2 mM ZnSO<sub>4</sub>. 0.2 mM is a Zn concentration comparable to what was found in the nasopharynx of mice infected with the pneumococcus, but far lower than its abundance in blood (~0.6 mM). These results suggest that the Zn sensitivity caused by loss of the *ccn* genes likely contributes to the reduced virulence of *S. pneumoniae*  $\Delta ccnABCDE$  mutant strains. While we were unable to detect by ICP-MS a statistically significant difference in the Zn content between *S. pneumoniae* and derived  $\Delta ccnABCDE$  mutant strain grown in BHI broth alone or supplemented with 0.2 mM Zn, we suspect that loss of the Ccn sRNA genes does increase the amount of bioavailable Zn in *S. pneumoniae* under these growth conditions since increased *czcD* expression is a sensitive indicator of high levels of bioavailable Zn inside of pneumococcal cells [24].

Prior work established that Zn inhibits Mn uptake by *S. pneumoniae* [26] and compromises the ability of *S. pneumoniae* to defend itself from oxidative stress due to inhibition of superoxide dismutase A (SodA) activity, when Zn is far more abundant in its environment than Mn. We tested whether the Zn sensitivity caused by deletion of the *ccn* genes from *S. pneumoniae* was due to a defect in Mn homeostasis and its oxidative stress response. In short, we found that the Zn-dependent growth inhibition caused the *ccnABCDE* deletion was completely alleviated by addition of Mn (Fig 4) or Oxyrase (Fig 7), which removes molecular oxygen by reducing it to water. Furthermore, deletion of *sodA*, encoding the Mn-dependent superoxide dismutase A, from *S. pneumoniae* resulted in a Zn-dependent growth inhibition; however, the same deletion had no impact on the growth of the  $\Delta ccnABCDE$  strain (Fig 8). Altogether, these results indicate that the Ccn sRNAs promote Zn homeostasis resulting in an increased abundance of active SodA, which improves the growth of *S. pneumoniae* in a Zn-rich environment due to greater protection from damaging reactive oxygen species.

How do the Ccn sRNAs prevent *S. pneumoniae* from accumulating bioavailable Zn<sup>2+</sup> cations relative to Mn<sup>2+</sup>? The Ccn sRNAs could preclude a Zn buildup by (1) promoting

expression of a Zn exporter, (2) negatively regulating expression of a Zn importer, or (3) increasing production of an intracellular protein or other factor that effectively chelates Zn. As mentioned already, CzcD is the main Zn exporter in *S. pneumoniae* and is essential for Zn resistance [32]. In contrast, the Adc system is important for Zn uptake, but supplementation with Zn is able to bypass the requirement for this transporter indicating that at least one unidentified low-affinity Zn importer exists in *S. pneumoniae* [30,33,34]. Our global analysis of gene expression in *S. pneumoniae* D39 or TIGR4 and derived  $\Delta ccnABCDE$  mutant strains revealed that *czcD* expression increased when the *ccn* genes were removed, whereas no significant difference in expression of any of the *adc* genes was observed. Thus, while we are not able to rule out the possibility that the Ccn sRNAs regulate expression of an uncharacterized transporter capable of translocating Zn, our results indicate that the Zn sensitivity of the  $\Delta ccnABCDE$  mutant strain is not due to reduced expression of *czcD* or up-regulation of the Adc system. While it also remains possible that the Ccn sRNAs regulate production of an unknown factor that chelates or chaperones intracellular Zn, we did not observe a reduction in the expression of any *known* Zn-binding proteins in the *ccn* mutant relative to its parental *ccn*<sup>+</sup> *S. pneumoniae* D39 or TIGR4 strain via RNA-seq (Tables 1, 3, S3, S4, and S5).

Even though, we did not observe a statistically significant decrease in total cell-associated Mn in the  $\Delta ccnABCDE$  mutant relative to its parental *S. pneumoniae* D39 strain, we still wondered whether or not loss of the Ccn sRNAs caused Zn sensitivity due to reduced uptake or increased export of Mn, since the ICP-MS based approach that we utilized measures total, not bioavailable metal abundance. The main Mn exporter of *S. pneumoniae* is MntE, as deletion of the encoding gene leads to accumulation of total cell associated Mn [25,35]. MgtA, designated as a Ca efflux protein, appears to also export Mn, but has a very limited role in this process [36]. Neither MntE or MgtA were up-regulated in either *S. pneumoniae* strain D39 or TIGR4 when the *ccn* genes were deleted (S3, S4, and S5 Tables) making it unlikely that the Ccn sRNAs increase intracellular Mn levels by down-regulating expression of these Mn exporter genes. Additionally, we were unable to identify strong Ccn sRNA binding sites in the translation initiation region of *mntE* or *mgtA*, which suggests that these sRNAs do not directly regulate translation of these transcripts. Finally, if the Ccn sRNAs increase total cell-associated Mn levels by down-regulating MntE expression, then we would expect that deletion of *mntE* would suppress the Zn hypersensitivity of the *S. pneumoniae*  $\Delta ccnABCDE$  mutant; however, this did not occur (S6A and S6C Fig).

An alternative possibility is that the Ccn sRNAs promote Mn uptake by positively regulating expression of the *psaBCA* operon encoding the only known Mn importer in *S. pneumoniae* [33, 37]. Localized to the inner membrane, PsaB is the ATP binding component whereas PsaC is the permease of this ABC-type transporter. PsaA, the substrate binding component, is located in the periplasm, where it binds Mn. Once again, in our RNA-seq experiments, we did not observe a decrease in expression of the *psaBCA* operon when the *ccn* genes were deleted from *S. pneumoniae* strain D39 or TIGR4 (S3, S4, and S5 Tables) indicating that the Ccn sRNAs do not positively regulate expression of this Mn importer. Furthermore, if this was the case, then we would expect that deletion of *psaR* encoding the repressor of the *psaBCA* operon [38, 39] might suppress the Zn-dependent growth inhibition of the *S. pneumoniae*  $\Delta ccnABCDE$  mutant; however, we did not observe this (S6B and S6D Fig).

In summary, we show that Ccn sRNAs play a key role in controlling the ability of *S. pneumoniae* to cause invasive pneumonia (Fig 1) and resist Zn intoxication (Fig 3). Our results indicate that the reduced growth of *S. pneumoniae* in the presence of excess, but physiologically relevant Zn concentrations caused by loss of the Ccn sRNA is due to an increase in oxidative stress (Figs 7 and 8). Our work suggests that there are likely additional, uncharacterized factors that modulate bioavailable Zn abundance in pneumococcus.

## Materials and Methods

### Ethics statement

All animal procedures were performed at the University of Texas Health Science Center at Houston with prior approval by University of Texas Health Science Center Animal Welfare Committee. The health and well-being of all laboratory animals were overseen by the Center for Laboratory Animal Medicine and Care (CLAMC). The University of Texas Health Science Center Animal Care and Use Program is fully accredited by the Association for Assessment and Accreditation of Laboratory Animal Care (AAALAC).

### Bacterial strains and growth conditions

Bacterial strains used in this study were derived from encapsulated *S. pneumoniae* serotype 2 strain D39W [14] and TIGR4 and are listed in S1 Table. Strains were grown on plates containing trypticase soy agar II (modified; Becton-Dickinson [BD]) and 5% (vol/vol) defibrinated sheep blood (TSAB II BA) at 37°C in an atmosphere of 5% CO<sub>2</sub>, and liquid cultures were statically grown in BD brain heart infusion (BHI) broth or C-medium [40] at 37°C in an atmosphere of 5% CO<sub>2</sub>. C-medium was prepared as described by Lacks and Hotchkiss, but water was added in place of yeast extract. Bacteria were inoculated into BHI broth from frozen cultures or single, isolated colonies. For overnight cultures, strains were first inoculated into a 17-mm-diameter polystyrene plastic tube containing 5 mL of BHI broth and then serially diluted by 100-fold into four tubes; these cultures were then grown for 10 to 16 h. Cultures with an optical density at 620 nm (OD<sub>620</sub>) of 0.1 to 0.4 were diluted to a starting OD<sub>620</sub> between 0.002 and 0.005 in 5 mL of BHI broth in 16-mm glass tubes. For growth in C-medium, 2 mL of overnight cultures grown in BHI with an OD<sub>620</sub> of 0.1 to 0.4 were spun down at 21,000 x g for 2.5 min at room temperature. The supernatant was removed, and the pellet was washed with 1.0 mL of C-medium. The solution was vortexed to resuspend the pellet and spun again at 21,000 x g for 2.5 min at room temperature. The supernatant was removed and the pellet was resuspended in 4.0 mL of C-medium. OD<sub>620</sub> was used to determine how much culture to add to 5.0 mL of C-medium in 16 mm glass tubes to begin growth at OD<sub>620</sub> = 0.002. Growth was monitored by measuring OD<sub>620</sub> using a Genesys 30 visible spectrophotometer (ThermoFisher Scientific). For antibiotic selections, TSAB II BA plates and BHI cultures were supplemented with 250 µg kanamycin per mL, 150 µg streptomycin per mL, or 0.3 µg erythromycin per mL.

### Construction and confirmation of mutants

Mutant strains were constructed by transformation of competent *S. pneumoniae* D39 and TIGR4 derived strains with linear PCR amplicons as described previously [41,42]. DNA amplicons containing antibiotic resistance markers were synthesized by overlapping fusion PCR using the primers listed in S2 Table. Competence was induced in *S. pneumoniae* D39 or TIGR4 derived cells with CSP-1 or CSP-2, respectively, synthetic competence stimulatory peptide. Unmarked deletions of the target genes were constructed using the *kan<sup>R</sup>-rpsL<sup>+</sup>* (Janus cassette) allele replacement method as described previously [43]. In the first step, the Janus cassette containing *rpsL<sup>+</sup>* allele and a kanamycin resistance gene was used to disrupt target genes in an *rpsL1* or *rpsLK56T* (*Str<sup>R</sup>*) strain background, and transformants were selected for kanamycin resistance and screened for streptomycin sensitivity. In the second step, the Janus cassette was eliminated by replacement with a PCR amplicon lacking antibiotic markers and the resulting transformants were selected for streptomycin resistance and screened for kanamycin sensitivity. Freezer stocks were made of each strain from single colonies isolated twice

on TSAII BA plates containing antibiotics listed in [S1 Table](#). All strains were validated by PCR amplification and sequencing.

### RNA extraction

To isolate RNA, strains were grown in 30 mL of BHI starting at an  $OD_{620} = 0.002$  in 50 mL conical tubes. RNA was extracted from exponentially growing cultures of IU1781 (D39), NRD10220 (TIGR4), and their derived isogenic mutants lacking all five *ccn* genes, NRD10176 (D39  $\Delta ccn$ ) and NRD10266 (TIGR4  $\Delta ccn$ ), at  $OD_{620} \approx 0.2$  using the FastRNA Pro Blue Kit (MP Bio) according to the manufacturer's guidelines. Briefly, cells were collected by centrifugation at 16,000 x g for 8 min at 4°C. Cell pellets were resuspended in 1 mL of RNAPro solution (MP Bio) and processed five-times for 40 sec at 400 rpm in a BeadBug homogenizer (Benchmark Scientific). Cell debris was removed by centrifugation at 16,000 x g for 5 min at 4°C. After mixing 300  $\mu$ L of chloroform with the supernatant, the aqueous and organic layers were separated by centrifugation at 16,000 x g for 5 min at 4°C. RNA was precipitated with 500  $\mu$ L of ethanol at -80°C overnight. After collecting the precipitated RNA by centrifugation at 16,000 x g for 15 min at 4°C, the pellet was washed once with 75% ethanol and suspend in DEPC-treated water. The amount and purity of all RNA samples isolated were assessed by NanoDrop spectroscopy (Thermo Fisher).

### Library preparation and mRNA-seq

cDNA libraries were prepared from total RNA Azenta Life Sciences. Briefly, total RNA was subjected to rRNA-depletion using the FastSelect 5S/16S/23S rRNA depletion kit for bacteria. Libraries were the generated with NEBNext Ultra II Directional RNA Library Prep Kit. 150 bp paired-end read sequencing was performed using an Illumina HiSeq4000 sequencer.

### RNA-seq analysis

The raw sequencing reads were quality and adapter trimmed using Cutadapt version 4.1 with a minimum length of 18 nucleotides. The trimmed reads were then mapped on the *Streptococcus pneumoniae* D39 (Genbank CP000410) genome using Bowtie2 [44]. HTseq version 2.0.2 was used to generate read counts for the genes [45]. Differential gene expression was identified using the program DESeq2 with default parameters [46]. Primary data from the mRNA-seq analyses were submitted to the NCBI Gene Expression Omnibus (GEO) and have the accession number GSE246655.

### Reverse transcriptase-droplet digital PCR (RT-ddPCR) analysis

RT-ddPCR was performed as described previously [47]. Isolated RNA was treated with DNase (TurboDNase, Ambion) as per manufacturer's instructions. Next, RNA (1  $\mu$ g) was reverse transcribed using Superscript III reverse transcriptase (Invitrogen) with random hexamers. RT and No RT control (NRT) sample were utilized. These samples were diluted 1:10<sup>1</sup>, 1:10<sup>2</sup>, 1:10<sup>3</sup>, 1:10<sup>4</sup> or 1:10<sup>6</sup>. Then, 2  $\mu$ L of each diluted RT and NRT sample was added to a 22  $\mu$ L reaction mixture containing 11  $\mu$ L of QX200 ddPCR Evagreen Supermix (Bio-Rad) and 1.1  $\mu$ L of each 2  $\mu$ M ddPCR primers ([S6 Table](#)). A single no template control (NTC) was included for each ddPCR primer pair used. Reactions were performed using at least three independent biological replicates. Droplets were generated using the QX200 Automated Droplet Generator (Bio-Rad), and end-point PCR was carried out using a C1000 Touch thermal cycler (Bio-Rad) following the manufacturer's instructions. Quantification of PCR-positive and PCR-negative droplets in each reaction, which provides absolute quantification of the target transcript, was

performed using the QX200 Droplet Reader (Bio-Rad). This data was analyzed with QuantaSoft software (Bio-Rad) to determine the concentration of each target expressed as copies per  $\mu\text{L}$ . Transcript copies were normalized to *tuf* mRNA (internal control) and fold changes of transcripts corresponding to target genes in different mutants relative to the WT parent were calculated. Statistical analysis was performed using Student's t-test with GraphPad Prism version 10.0.0.

### Northern blot analysis

Northern blotting was conducted as previously described [13]. Briefly, 3  $\mu\text{g}$  of isolated RNA was fractionated on 10% polyacrylamide gels containing 7% urea by electrophoresis at 55 V and subsequently, transferred to a Zeta-probe membrane (Bio-Rad) using a Trans-Blot SD semidry transfer apparatus (Bio-rad) at 4 mA per  $\text{cm}^2$  with a maximum of 400 mA for 50 min. RNA was then UV-crosslinked to the membrane with a Spectroline UV crosslinker with the "optimal crosslink" setting. 5'-Biotinylated probes were hybridized to the membrane overnight at 42°C in ULTRAhyb (Ambion) hybridization buffer. Blots were developed according to the BrightStar BioDetect kit protocol (Ambion), imaged with the ChemiDoc MP imager (Bio-Rad), and individual band intensities were quantified using Image Lab software version 5.2.1 (Bio-Rad). Signal intensities for each transcript were normalized to that of 5S rRNA, which served as a loading control. Graphs of normalized abundance of each transcript for three biological replicates were produced using GraphPad Prism version 10.0.0.

### Inductively coupled plasma-mass spectrometry (ICP-MS) analysis

ICP-MS sample preparation was based on a previous publication [48], with some modifications. Metal-free microfuge tubes were used throughout, and pipette tips were rinsed prior to use. Bacteria were grown in BHI broth or C medium at 37°C with 5%  $\text{CO}_2$  to  $\text{OD}_{620} = 0.2$ . Five mL of culture was centrifuged for 10 min in pre-chilled tubes at 12,400  $\times g$  at 4°C, and cell pellets were resuspended in 1.0 mL of chilled BHI supplemented with 1 mM nitrilotriacetic acid (Sigma-Aldrich) (pH 7.2). Samples were centrifuged for 7 min at 16,100  $\times g$  at 4°C, and supernatants were removed. Pellets were centrifuged for an additional 3 min in the same way, and residual supernatant was removed. Cell pellets were washed twice with centrifugation in the same way with 1.0 mL of chilled PBS lacking  $\text{K}^+$  (130 mM NaCl, 8.8mM  $\text{Na}_2\text{HPO}_4$ , 1.2mM  $\text{NaH}_2\text{PO}_4$ , pH 7.0) that had been treated with chelator. Chelated PBS was prepared by mixing with 1% (wt/vol) Chelex-100 (BioRad), which was rotated overnight at 4°C and passed through a 0.22  $\mu\text{m}$  Steriflip (MilliporeSigma) filter. Before the last centrifugation in PBS, samples were split into two 0.475 mL aliquots for ICP-MS analysis and protein quantification. After removal of supernatants, pellets for ICP-MS were dried for 15 h at low heat in an evaporative centrifuge and stored at -80°C until being processed for ICP-MS analysis. Pellets for protein determination were suspended in 100  $\mu\text{L}$  of lysis buffer (1% (wt/vol) SDS [Sigma], 0.1% w/v Triton X-100 [Mallinckrodt]) and stored at -80°C. Protein amount was determined by using the DC protein assay (BioRad). For ICP-MS analysis, dried samples were resuspended in 400  $\mu\text{L}$  of 30% trace metal grade  $\text{HNO}_3$  (Sigma). Samples and a 30%  $\text{HNO}_3$  blank were heated at 95°C for 10 min with shaking at 500 rpm. Samples were then diluted 100-fold to a final volume of 3.0 mL with 2.5%  $\text{HNO}_3$  containing the Pure Plus Internal Standard Mix (100 ppb, PerkinElmer). Samples were analyzed using an Agilent 8800 QQQ ICP-MS operating with hydrogen ( $^{55}\text{Mn}$  detection) or helium ( $^{66}\text{Zn}$  detection) as collision gases to remove possible interferences.  $^{45}\text{Sc}$  or  $^{72}\text{Ge}$  were used as internal references.  $\text{Zn}^{2+}$  and  $\text{Mn}^{2+}$  amounts were calculated from standard curves made with Pure Plus Multi-Element Calibration Standard 3 (0.5-100ppb, PerkinElmer). Metals amounts detected in the 30%  $\text{HNO}_3$  blank were subtracted



from all samples. Metal amounts in samples were normalized relative to total protein amounts in the matched samples.

### Mouse models of infection

All procedures were approved in advance by University of Texas Health Science Center Animal Welfare Committee and carried out as previously described [47]. Male ICR mice (21–24 g; Envigo) were anaesthetized by inhaling 4 to 5% isoflurane. A total of 8 mice were intranasally inoculated with  $10^7$  CFU of a specific *S. pneumoniae* strain suspended in 50  $\mu$ L of 1 X PBS prepared from cultures grown in BHI broth at 37°C in an atmosphere of 5% CO<sub>2</sub> to OD<sub>620</sub>  $\approx$  0.1. Mice were monitored visually at 4 to 8 h intervals, and isoflurane-anesthetized moribund mice were euthanized by cardiac puncture-induced exsanguination followed by cervical dislocation. Kaplan-Meier survival curves and log-rank tests were generated using GraphPad Prism 10.0.0 software.

### Supporting information

**S1 Fig. Virulence phenotypes of *S. pneumoniae* strains harboring deletion of individual *ccn* genes.** Survival curve of ICR outbred mice after infection with  $\sim 10^7$  CFU in a 50  $\mu$ L inoculum of the following *S. pneumoniae* strains: (A) IU781 (D39), NRD10073 ( $\Delta ccnA$ ), and NRD10077 ( $\Delta ccnE$ ); (B) IU781 (D39), NRD10074 ( $\Delta ccnB$ ), NRD10075 ( $\Delta ccnC$ ), and NRD10076 ( $\Delta ccnD$ ). Eight mice were infected per strain. Disease progression of animals was monitored, the time at which animals reached a moribund state was recorded, and these mice were subsequently euthanized as described in Materials and Methods. A survival curve was generated from this data and analyzed by Kaplan-Meier statistics and log rank test to determine P-values. (TIF)

**S2 Fig. Growth phenotypes of *S. pneumoniae* D39 derived strains harboring deletion of specific *ccn* genes.** Growth characteristics at 37°C under an atmosphere of 5% CO<sub>2</sub> in BHI broth alone (A,C, E, G, I, K, M, O) or with 0.2 mM ZnSO<sub>4</sub> (B, D, F, H, J, L, N, P) of the following strains: (A, B) IU781 (D39), NRD10073 ( $\Delta ccnA$ ), and NRD10074 ( $\Delta ccnB$ ); (C, D) IU781 (D39), NRD10075 ( $\Delta ccnC$ ), NRD10076 ( $\Delta ccnD$ ), and NRD10077 ( $\Delta ccnE$ ); (E, F) IU781 (D39), NRD10165 ( $\Delta ccnACE$ ), and NRD10166 ( $\Delta ccnADE$ ); (G, H) IU781 (D39), NRD10376 ( $\Delta ccnBCE$ ), NRD10379 ( $\Delta ccnBDE$ ), and NRD10380 ( $\Delta ccnCDE$ ); (I, J) IU781 (D39), NRD10081 ( $\Delta ccnBCD$ ), and NRD10084 ( $\Delta ccnACD$ ); (K, L) IU781 (D39), NRD10372 ( $\Delta ccnABC$ ), NRD10373 ( $\Delta ccnABD$ ), and NRD10374 ( $\Delta ccnABE$ ); (M, N) IU781 (D39), NRD10085 ( $\Delta ccnBCDE$ ), and NRD10174 ( $\Delta ccnACDE$ ); (O,P) IU781 (D39), NRD10172 ( $\Delta ccnABCE$ ), NRD10173 ( $\Delta ccnABDE$ ), and NRD10175 ( $\Delta ccnABCD$ ). Each point on the graph represents the mean OD<sub>620</sub> value from three independent cultures. Error bars, which in some cases are too small to observe in the graph, represent the standard deviation (SD). (TIF)

**S3 Fig. Growth phenotypes of *S. pneumoniae* D39,  $\Delta ccnABCDE$  mutant, and derived strain complemented with *ccnC* and *ccnD* or *ccnA* and *ccnB*.** Growth characteristics at 37°C under an atmosphere of 5% CO<sub>2</sub> in BHI broth alone (A, C) or with 0.2 mM ZnSO<sub>4</sub> (B, D) of IU781 (D39), NRD10176 ( $\Delta ccn$ ), and NRD10397 ( $\Delta ccn//ccnC^+D^+$ ) (A,B) or NRD10393 ( $\Delta ccn//ccnA^+B^+$ ) (C, D). Each point on the graph represents the mean OD<sub>620</sub> value from three independent cultures. Error bars, which in some cases are too small to observe in the graph, represent the standard deviation (SD). (TIF)

**S4 Fig. Growth phenotypes of *S. pneumoniae* TIGR4 derived strains harboring deletion of the *ccn* genes.** Growth characteristics at 37°C under an atmosphere of 5% CO<sub>2</sub> in BHI broth

alone (A) or with 0.2 mM (B) or 0.4 mM (C) ZnSO<sub>4</sub> of NRD10311 (TIGR4; TIGR4 *rpsL*<sup>+</sup>-*rpsG*<sup>+</sup>-*cat*) and NRD10346 ( $\Delta$ *ccn*; TIGR4 *rpsL*<sup>+</sup>-*rpsG*<sup>+</sup>-*cat*  $\Delta$ *ccnABCDE*). Each point on the graph represents the mean OD<sub>620</sub> value from three independent cultures. Error bars, which in some cases are too small to observe in the graph, represent the standard deviation (SD). (TIF)

**S5 Fig. Doubling times of *S. pneumoniae* D39,  $\Delta$ *ccnABCDE* mutant, or  $\Delta$ *ccnABCDE* mutant strain complemented with *ccnA*, *ccnB*, and *ccnC* in C medium alone or supplemented with Zn.** Shown are the mean doubling times during exponential growth of IU1781 (D39), NRD10176 ( $\Delta$ *ccn*), and NRD10396 ( $\Delta$ *ccn/ccnA*<sup>+</sup>*B*<sup>+</sup>*D*<sup>+</sup>) grown in C medium alone or supplemented with 0.2 mM ZnSO<sub>4</sub> as described in *Materials and Methods*. Doubling times for individual replicates are shown with solid lines indicating the mean of six different biological replicates and error bars denoting standard error of the mean (SEM). Statistical significance as determined by a Mann-Whitney test is indicated as \* (P < 0.05), \*\* (P < 0.005), \*\*\* (P < 0.0005), or \*\*\*\* (P < 0.00005). (TIF)

**S6 Fig. Growth phenotypes of *S. pneumoniae* D39 and derived strains harboring deletion of the *ccn* genes and/or *psaR* or *mntE*.** Growth characteristics at 37°C under an atmosphere of 5% CO<sub>2</sub> in BHI broth alone (A, B) or with 0.2 mM ZnSO<sub>4</sub> (C, D) of the following strains: (A, C) IU781 (D39), NRD10176 ( $\Delta$ *ccnABCDE*), NRD10448 ( $\Delta$ *mntE*), and NRD10450 ( $\Delta$ *ccnABCDE*  $\Delta$ *mntE*); (B, D) IU781 (D39), NRD10176 ( $\Delta$ *ccnABCDE*), NRD10447 ( $\Delta$ *psaR*), and NRD10450 ( $\Delta$ *ccnABCDE*  $\Delta$ *psaR*). Each point on the graph represents the mean OD<sub>620</sub> value from three independent cultures. Error bars, which in some cases are too small to observe in the graph, represent the standard deviation (SD). (TIF)

**S1 Table. *S. pneumoniae* strains used in this study.**  
(DOCX)

**S2 Table. Primers used to construct mutants used in this study.**  
(DOCX)

**S3 Table. Comparison of gene expression *S. pneumoniae* D39 and derived  $\Delta$ *ccnABCDE* strains in BHI broth by RNA-seq.**  
(XLSX)

**S4 Table. Comparison of gene expression *S. pneumoniae* TIGR4 and derived  $\Delta$ *ccnABCDE* strains in BHI broth by RNA-seq.**  
(XLSX)

**S5 Table. Comparison of gene expression *S. pneumoniae* D39 and derived  $\Delta$ *ccnABCDE* strains in BHI broth with 0.2 mM ZnSO<sub>4</sub> by RNA-seq.**  
(XLSX)

**S6 Table. Oligonucleotide primers used for qRT-PCR.**  
(DOCX)

## Author Contributions

**Conceptualization:** Nicholas R. De Lay, Dhriti Sinha, Abigail Garrett, David P. Giedroc, Malcolm E. Winkler.

**Data curation:** Nicholas R. De Lay.

**Formal analysis:** Nicholas R. De Lay, Nidhi Verma, Dhriti Sinha, Abigail Garrett.

**Funding acquisition:** Nicholas R. De Lay, Maximillian K. Osterberg, David P. Giedroc, Malcolm E. Winkler.

**Investigation:** Nicholas R. De Lay, Nidhi Verma, Dhriti Sinha, Abigail Garrett, Maximillian K. Osterberg, Daisy Porter, Spencer Reiling.

**Methodology:** Nicholas R. De Lay.

**Project administration:** Nicholas R. De Lay.

**Resources:** Nicholas R. De Lay, David P. Giedroc, Malcolm E. Winkler.

**Supervision:** Nicholas R. De Lay, David P. Giedroc, Malcolm E. Winkler.

**Writing – original draft:** Nicholas R. De Lay.

**Writing – review & editing:** Nicholas R. De Lay, David P. Giedroc, Malcolm E. Winkler.

## References

1. Mediaty DG, Wu S, Wu W, Tree JJ. Networks of Resistance: Small RNA Control of Antibiotic Resistance. *Trends Genet* 2021; 37(1):35–45. <https://doi.org/10.1016/j.tig.2020.08.016> PMID: 32951948
2. Ghandour R, Papenfort K. Small regulatory RNAs in *Vibrio cholerae*. *MicroLife*. 2023; 4:uqad030. <https://doi.org/10.1093/femsml/uqad030> PMID: 37441523
3. Papenfort K, Melamed S. Small RNAs, Large Networks: Posttranscriptional Regulons in Gram-Negative Bacteria. *Annual Review of Microbiology*. 2023; 77:23–43. <https://doi.org/10.1146/annurev-micro-041320-025836> PMID: 36944261
4. Hor J, Matera G, Vogel J, Gottesman S, Storz G. Trans-Acting Small RNAs and Their Effects on Gene Expression in *Escherichia coli* and *Salmonella enterica*. *EcoSal Plus*. 2020; 9(1). <https://doi.org/10.1128/ecosalplus.ESP-0030-2019> PMID: 32213244
5. Pourciau C, Lai YJ, Gorelik M, Babitzke P, Romeo T. Diverse Mechanisms and Circuitry for Global Regulation by the RNA-Binding Protein CsrA. *Frontiers in Microbiology*. 2020; 11: 601352. <https://doi.org/10.3389/fmicb.2020.601352> PMID: 33193284
6. Jørgensen MG, Pettersen JS, Kallipolitis BH. sRNA-mediated control in bacteria: An increasing diversity of regulatory mechanisms. *Biochim Biophys Acta Gene Regul Mech*. 2020; 1863(5):194504. <https://doi.org/10.1016/j.bbagrm.2020.194504> PMID: 32061884
7. Bossi L, Figueroa-Bossi N, Boulouc P, Boudvillain M. Regulatory interplay between small RNAs and transcription termination factor Rho. *Biochim Biophys Acta Gene Regul Mech*. 2020; 1863(7):194546. <https://doi.org/10.1016/j.bbagrm.2020.194546> PMID: 32217107
8. Ponath F, Hör J, Vogel J. An overview of gene regulation in bacteria by small RNAs derived from mRNA 3' ends. *FEMS Microbiology Reviews*. 2022; 46(5):fuac017. <https://doi.org/10.1093/femsre/fuac017> PMID: 35388892
9. G. B. D. L. R. I. Collaborators. Estimates of the global, regional, and national morbidity, mortality, and aetiologies of lower respiratory infections in 195 countries, 1990–2016: a systematic analysis for the Global Burden of Disease Study 2016. *Lancet Infect Dis*. 2018; 18(11):1191–1210. [https://doi.org/10.1016/S1473-3099\(18\)30310-4](https://doi.org/10.1016/S1473-3099(18)30310-4) PMID: 30243584
10. Acebo P, Martin-Galiano AJ, Navarro S, Zaballo A, Amblar M. Identification of 88 regulatory small RNAs in the TIGR4 strain of the human pathogen *Streptococcus pneumoniae*. *RNA*. 2012; 18(3):530–46. <https://doi.org/10.1261/rna.027359.111> PMID: 22274957
11. Kumar R, Shah P, Swiatlo E, Burgess SC, Lawrence ML, Nanduri B. Identification of novel non-coding small RNAs from *Streptococcus pneumoniae* TIGR4 using high-resolution genome tiling arrays. *BMC Genomics*. 2010; 11:350. <https://doi.org/10.1186/1471-2164-11-350> PMID: 20525227
12. Mann B, van Opijnen T, Wang J, Obert C, Wang YD, Carter R, et al. Control of virulence by small RNAs in *Streptococcus pneumoniae*. *PLoS Pathogens*. 2012; 8(7):e1002788. <https://doi.org/10.1371/journal.ppat.1002788> PMID: 22807675
13. Sinha D, Zimmer K, Cameron TA, Rusch DB, Winkler ME, De Lay NR. Redefining the sRNA Transcriptome in *Streptococcus pneumoniae* Serotype 2 Strain D39. *Journal of Bacteriology*. 2019; 201(14): e00764–18. <https://doi.org/10.1128/JB.00764-18> PMID: 30833353

14. Slager J, Aprianto R, Veening JW. Deep genome annotation of the opportunistic human pathogen *Streptococcus pneumoniae* D39. *Nucleic Acids Research*. 2018; 46(19):9971–9989. <https://doi.org/10.1093/nar/gky725> PMID: 30107613
15. Tsui HC, Mukherjee D, Ray VA, Sham LT, Feig AL, Winkler ME. Identification and characterization of noncoding small RNAs in *Streptococcus pneumoniae* serotype 2 strain D39. *Journal of Bacteriology*. 2010; 192(1):264–79. <https://doi.org/10.1128/JB.01204-09> PMID: 19854910
16. Halfmann A, Kovács M, Hakenbeck R, Brückner R. Identification of the genes directly controlled by the response regulator CiaR in *Streptococcus pneumoniae*: five out of 15 promoters drive expression of small non-coding RNAs. *Molecular Microbiology*. 2007; 66(1):110–26. <https://doi.org/10.1111/j.1365-2958.2007.05900.x> PMID: 17725562
17. Hentrich K, Löfling J, Pathak A, Nizet V, Varki A, Henriques-Normark B. *Streptococcus pneumoniae* Senses a Human-like Sialic Acid Profile via the Response Regulator CiaR. *Cell Host Microbe*. 2016; 20(3):307–317. <https://doi.org/10.1016/j.chom.2016.07.019> PMID: 27593514
18. Rogers PD, Liu TT, Barker KS, Hilliard GM, English BK, Thornton J, et al. Gene expression profiling of the response of *Streptococcus pneumoniae* to penicillin. *J Antimicrob Chemother*. 2007; 59(4):616–26. <https://doi.org/10.1093/jac/dkl560> PMID: 17339278
19. Schnorpfel A, Kranz M, Kovács M, Kirsch C, Gartmann J, Brunner I, et al. Target evaluation of the non-coding csRNAs reveals a link of the two-component regulatory system CiaRH to competence control in *Streptococcus pneumoniae* R6. *Molecular Microbiology*. 2013; 89(2):334–49. <https://doi.org/10.1111/mmi.12277> PMID: 23710838
20. Orihuela CJ, Gao G, McGee M, Yu J, Francis KP, Tuomanen E. Organ-specific models of *Streptococcus pneumoniae* disease. *Scand J Infect Dis*. 2003; 35(9):647–52. <https://doi.org/10.1080/00365540310015854> PMID: 14620149
21. Donati C, Hiller NL, Tettelin H, Muzzi A, Croucher NJ, Angiuoli SV, et al. Structure and dynamics of the pan-genome of *Streptococcus pneumoniae* and closely related species. *Genome Biol*. 2010; 11(10):R107. <https://doi.org/10.1186/gb-2010-11-10-r107> PMID: 21034474
22. Eijkelkamp BA, Morey JR, Ween MP, Ong CL, McEwan AG, Paton JC, et al. Extracellular zinc competitively inhibits manganese uptake and compromises oxidative stress management in *Streptococcus pneumoniae*. *PLoS One*. 2014; 9(2):e89427. <https://doi.org/10.1371/journal.pone.0089427> PMID: 24558498
23. Kloosterman TG, Witwicki RM, van der Kooi-Pol MM, Bijlsma JJ, Kuipers OP. Opposite effects of Mn<sup>2+</sup> and Zn<sup>2+</sup> on PsaR-mediated expression of the virulence genes *pcpA*, *prtA*, and *psaBCA* of *Streptococcus pneumoniae*. *Journal of Bacteriology*. 2008; 190(15):5382–93. <https://doi.org/10.1128/JB.00307-08> PMID: 18515418
24. Martin JE, Edmonds KA, Bruce KE, Campanello GC, Eijkelkamp BA, Brazel EB, et al. The zinc efflux activator SczA protects *Streptococcus pneumoniae* serotype 2 D39 from intracellular zinc toxicity. *Molecular Microbiology*. 2017; 104(4):636–651. <https://doi.org/10.1111/mmi.13654> PMID: 28249108
25. Martin JE, Lisher JP, Winkler ME, Giedroc DP. Perturbation of manganese metabolism disrupts cell division in *Streptococcus pneumoniae*. *Molecular Microbiology*. 2017; 104(2):334–348. <https://doi.org/10.1111/mmi.13630> PMID: 28127804
26. McDevitt CA, Ogunniyi AD, Valkov E, Lawrence MC, Kobe B, McEwan AG, et al. A molecular mechanism for bacterial susceptibility to zinc. *PLoS Pathogens*. 2011; 7(11):e1002357. <https://doi.org/10.1371/journal.ppat.1002357> PMID: 22072971
27. McFarland AL, Bhattarai N, Joseph M, Winkler ME, Martin JE. Cellular Mn/Zn Ratio Influences Phosphoglucomutase Activity and Capsule Production in *Streptococcus pneumoniae* D39. *Journal of Bacteriology*. 2021; 203(13):e0060220. <https://doi.org/10.1128/JB.00602-20> PMID: 33875543
28. Jacobsen FE, Kazmierczak KM, Lisher JP, Winkler ME, Giedroc DP. Interplay between manganese and zinc homeostasis in the human pathogen *Streptococcus pneumoniae*. *Metallomics*. 2011; 3(1):38–41. <https://doi.org/10.1039/c0mt00050g> PMID: 21275153
29. Ogunniyi AD, Mahdi LK, Jennings MP, McEwan AG, McDevitt CA, Van der Hoek MB, et al. Central role of manganese in regulation of stress responses, physiology, and metabolism in *Streptococcus pneumoniae*. *Journal of Bacteriology*. 2010; 192(17):4489–97. <https://doi.org/10.1128/JB.00064-10> PMID: 20601473
30. Bayle L, Chimalapati S, Schoehn G, Brown J, Vernet T, Durmort C. Zinc uptake by *Streptococcus pneumoniae* depends on both AdcA and AdcAll and is essential for normal bacterial morphology and virulence. *Molecular Microbiology*. 2011; 82(4):904–16. <https://doi.org/10.1111/j.1365-2958.2011.07862.x> PMID: 22023106
31. Eijkelkamp BA, Morey JR, Neville SL, Tan A, Pederick VG, Cole N, et al. Dietary zinc and the control of *Streptococcus pneumoniae* infection. *PLoS Pathogens*. 2019; 15(8):e1007957. <https://doi.org/10.1371/journal.ppat.1007957> PMID: 31437249

32. Kloosterman TG, van der Kooi-Pol MM, Bijlsma JJ, Kuipers OP. The novel transcriptional regulator SczA mediates protection against Zn<sup>2+</sup> stress by activation of the Zn<sup>2+</sup>-resistance gene *czcD* in *Streptococcus pneumoniae*. *Molecular Microbiology*. 2007; 65(4):1049–63. <https://doi.org/10.1111/j.1365-2958.2007.05849.x> PMID: 17640279
33. Dintilhac A, Alloing G, Granadel C, Claverys JP. Competence and virulence of *Streptococcus pneumoniae*: Adc and PsaA mutants exhibit a requirement for Zn and Mn resulting from inactivation of putative ABC metal permeases. *Molecular Microbiology*. 1997; 25(4):727–39. <https://doi.org/10.1046/j.1365-2958.1997.5111879.x> PMID: 9379902
34. Plumptre CD C., Eijkelkamp BA, Morey JR, Behr F, Couñago RM, Ogunniyi AD, et al. AdcA and AdcAll employ distinct zinc acquisition mechanisms and contribute additively to zinc homeostasis in *Streptococcus pneumoniae*. *Molecular Microbiology*. 2014; 91(4):834–51. <https://doi.org/10.1111/mmi.12504> PMID: 24428621
35. Rosch JW, Gao G, Ridout G, Wang YD, Tuomanen EI. Role of the manganese efflux system *mntE* for signalling and pathogenesis in *Streptococcus pneumoniae*. *Molecular Microbiology*. 2009; 72(1):12–25. <https://doi.org/10.1111/j.1365-2958.2009.06638.x> PMID: 19226324
36. Martin JE, Le MT, Bhattarai N, Capdevila DA, Shen J, Winkler ME, et al. A Mn-sensing riboswitch activates expression of a Mn<sup>2+</sup>/Ca<sup>2+</sup> ATPase transporter in *Streptococcus*. *Nucleic Acids Research*. 2019; 47(13):6885–6899. <https://doi.org/10.1093/nar/gkz494> PMID: 31165873
37. Novak R, Braun JS, Charpentier E, Tuomanen E. Penicillin tolerance genes of *Streptococcus pneumoniae*: the ABC-type manganese permease complex Psa. *Molecular Microbiology*. 1998; 29(5):1285–96. <https://doi.org/10.1046/j.1365-2958.1998.01016.x> PMID: 9767595
38. Jakubovics NS, Smith AW, Jenkinson HF. Expression of the virulence-related Sca (Mn<sup>2+</sup>) permease in *Streptococcus gordonii* is regulated by a diphtheria toxin metallopressor-like protein ScaR. *Molecular Microbiology*. 2000; 38(1):140–53. <https://doi.org/10.1046/j.1365-2958.2000.02122.x> PMID: 11029696
39. Johnston JW, Briles DE, Myers LE, Hollingshead SK. Mn<sup>2+</sup>-dependent regulation of multiple genes in *Streptococcus pneumoniae* through PsaR and the resultant impact on virulence. *Infection and Immunity*. 2006; 74(2):1171–80. <https://doi.org/10.1128/IAI.74.2.1171-1180.2006> PMID: 16428766
40. Lacks S, Hotchkiss RD. A study of the genetic material determining an enzyme in *Pneumococcus*. *Biochim Biophys Acta*. 1960; 39:508–18. [https://doi.org/10.1016/0006-3002\(60\)90205-5](https://doi.org/10.1016/0006-3002(60)90205-5) PMID: 14413322
41. Ramos-Montañez S, Tsui HC, Wayne KJ, Morris JL, Peters LE, Zhang F, et al. Polymorphism and regulation of the *spxB* (pyruvate oxidase) virulence factor gene by a CBS-HotDog domain protein (SpxR) in serotype 2 *Streptococcus pneumoniae*. *Molecular Microbiology*. 2008; 67(4):729–46. <https://doi.org/10.1111/j.1365-2958.2007.06082.x> PMID: 18179423
42. Bruce KE, Rued BE, Tsui HT, Winkler ME. The Opp (AmiACDEF) Oligopeptide Transporter Mediates Resistance of Serotype 2 *Streptococcus pneumoniae* D39 to Killing by Chemokine CXCL10 and Other Antimicrobial Peptides. *Journal of Bacteriology*. 2018; 200(11):e00745–17. <https://doi.org/10.1128/JB.00745-17> PMID: 29581408
43. Kazmierczak KM, Wayne KJ, Rechtsteiner A, Winkler ME. Roles of rel<sub>Spn</sub> in stringent response, global regulation and virulence of serotype 2 *Streptococcus pneumoniae* D39. *Molecular Microbiology*. 2009; 72(3):590–611. <https://doi.org/10.1111/j.1365-2958.2009.06669.x> PMID: 19426208
44. Langmead B, Salzberg SL. Fast gapped-read alignment with Bowtie 2. *Nature Methods*. 2012; 9(4):357–9. <https://doi.org/10.1038/nmeth.1923> PMID: 22388286
45. Anders S, Pyl PT, Huber W. HTSeq—a Python framework to work with high-throughput sequencing data. *Bioinformatics*. 2015; 31(2):166–9. <https://doi.org/10.1093/bioinformatics/btu638> PMID: 25260700
46. Love MI, Huber W, Anders S. Moderated estimation of fold change and dispersion for RNA-seq data with DESeq2. *Genome Biol*. 2014; 15(12):550. <https://doi.org/10.1186/s13059-014-0550-8> PMID: 25516281
47. Sinha D, Frick JP, Clemons K, Winkler ME, De Lay NR. Pivotal Roles for Ribonucleases in *Streptococcus pneumoniae* Pathogenesis. *mBio*. 2021; 12(5):e0238521. <https://doi.org/10.1128/mBio.02385-21> PMID: 34544281
48. Fu Y, Tsui HC, Bruce KE, Sham LT, Higgins KA, Lisher JP, et al. A new structural paradigm in copper resistance in *Streptococcus pneumoniae*. *Nat Chem Biol*. 2013; 9(3):177–83. <https://doi.org/10.1038/nchembio.1168> PMID: 23354287
